# Supplementary material for: Polymerization of isoprene and butadiene with unparalleled stereoselectivity catalysed by rare-earth metal cationic species bearing a novel tridentate ligand
Source: Royal Society of Chemistry journal article supplement (doi:10.1039/d4py00781f), 2024-01-01
Supplement: d4py00781f1.pdf [file d4py00781f1.pdf]

SUPPORTING INFORMATION

**Polymerization of Isoprene and Butadiene with  
Unparallel Stereoselectivity Catalysed by Rare-earth Metal  
Cationic Species Bearing a Novel Tridentate Ligand**

Xiuling Wang,<sup>a</sup> Yang Wang,<sup>a</sup> Zhonglei Qin<sup>a</sup>, Liying Shen<sup>\*b</sup> and Xiaochao Shi<sup>\*a</sup>

<sup>a</sup>Department of Polymer Materials, School of Materials Science and Engineering, Shanghai University, Shanghai 200444, China. E-mail: [xcshi@shu.edu.cn](mailto:xcshi@shu.edu.cn)

<sup>b</sup>Hebei Key Laboratory of Heterocyclic Compounds, Handan University, Handan, 056005, China. E-mail: [sly19811025@hdc.edu.cn](mailto:sly19811025@hdc.edu.cn).

**Figure S1**  $^1\text{H}$  NMR spectrum of **L1-H** (400 MHz,  $\text{CDCl}_3$ , 25 °C)  
**Figure S2**  $^{13}\text{C}$  NMR spectrum of **L1-H** (400 MHz,  $\text{CDCl}_3$ , 25 °C)  
**Figure S3**  $^1\text{H}$  NMR spectrum of **1-Sc** (400 MHz,  $\text{CDCl}_3$ , 25 °C)  
**Figure S4**  $^{13}\text{C}$  NMR spectrum of **1-Sc** (400 MHz,  $\text{CDCl}_3$ , 25 °C)  
**Figure S5**  $^1\text{H}$  NMR spectrum of **1-Y** (400 MHz,  $\text{CDCl}_3$ , 25 °C)  
**Figure S6**  $^{13}\text{C}$  NMR spectrum of **1-Y** (400 MHz,  $\text{CDCl}_3$ , 25 °C)  
**Figure S7**  $^1\text{H}$  NMR spectrum of **1-Lu** (400 MHz,  $\text{CDCl}_3$ , 25 °C)  
**Figure S8**  $^{13}\text{C}$  NMR spectrum of **1-Lu** (400 MHz,  $\text{CDCl}_3$ , 25 °C)  
**Figure S9** (a) Polymerization of isoprene with **1-Y** /  $[(\text{Ph}_3\text{C})(\text{B}(\text{C}_6\text{F}_5)_4)]$  as a precursor: molecular weight vs conversion. (b) Polymerization of isoprene with **1-Y** /  $[(\text{Ph}_3\text{C})(\text{B}(\text{C}_6\text{F}_5)_4)]$  as a precursor: molecular weight vs isoprene-to-**[1-Y]** ratio.  
**Figure S10**  $^1\text{H}$  NMR (400 MHz,  $\text{CDCl}_3$ , 25 °C) spectrum of polyisoprene catalyzed by **1-Sc** (Entry 1 in Table 1)  
**Figure S11**  $^{13}\text{C}$  NMR (400 MHz,  $\text{CDCl}_3$ , 25 °C) spectrum of polyisoprene catalyzed by **1-Sc** (Entry 1 in Table 1)  
**Figure S12**  $^1\text{H}$  NMR (400 MHz,  $\text{CDCl}_3$ , 25 °C) spectrum of polybutadiene catalyzed by **1-Sc** (Entry 3 in Table 1)  
**Figure S13**  $^{13}\text{C}$  NMR (400 MHz,  $\text{CDCl}_3$ , 25 °C) spectrum of polybutadiene catalyzed by **1-Sc** (Entry 3 in Table 1)  
**Figure S14**  $^1\text{H}$  NMR (400 MHz,  $\text{CDCl}_3$ , 25 °C) spectrum of polyisoprene catalyzed by **1-Y** (Entry 5 in Table 1)  
**Figure S15**  $^{13}\text{C}$  NMR (400 MHz,  $\text{CDCl}_3$ , 25 °C) spectrum of polyisoprene catalyzed by **1-Y** (Entry 5 in Table 1)  
**Figure S16**  $^1\text{H}$  NMR (400 MHz,  $\text{CDCl}_3$ , 25 °C) spectrum of polyisoprene catalyzed by **1-Y**/ $[\text{PhMe}_2\text{NH}][\text{B}(\text{C}_6\text{F}_5)_4]$  (Entry 6 in Table 1)  
**Figure S17**  $^{13}\text{C}$  NMR (400 MHz,  $\text{CDCl}_3$ , 25 °C) spectrum of polyisoprene catalyzed by **1-Y**/ $[\text{PhMe}_2\text{NH}][\text{B}(\text{C}_6\text{F}_5)_4]$  (Entry 6 in Table 1)  
**Figure S18**  $^1\text{H}$  NMR (400 MHz,  $\text{CDCl}_3$ , 25 °C) spectrum of polybutadiene catalyzed by **1-Y** (Entry 14 in Table 1)  
**Figure S19**  $^{13}\text{C}$  NMR (400 MHz,  $\text{CDCl}_3$ , 25 °C) spectrum of polybutadiene catalyzed by **1-Y** (Entry 14 in Table 1)  
**Figure S20**  $^1\text{H}$  NMR (400 MHz,  $\text{CDCl}_3$ , 25 °C) spectrum of polyisoprene catalyzed by **1-Lu** (Entry 17 in Table 1)  
**Figure S21**  $^{13}\text{C}$  NMR (400 MHz,  $\text{CDCl}_3$ , 25 °C) spectrum of polyisoprene catalyzed by **1-Lu** (Entry 17 in Table 1)  
**Figure S22**  $^1\text{H}$  NMR (400 MHz,  $\text{CDCl}_3$ , 25 °C) spectrum of polybutadiene catalyzed by **1-Lu** (Entry 19 in Table 1)  
**Figure S23**  $^{13}\text{C}$  NMR (400 MHz,  $\text{CDCl}_3$ , 25 °C) spectrum of polybutadiene catalyzed by **1-Lu** (Entry 19 in Table 1)  
**Figure S24**  $^1\text{H}$  NMR (400 MHz,  $\text{CDCl}_3$ , 25 °C) spectrum of polyisoprene catalyzed by **1-Tm** (Entry 21 in Table 1)  
**Figure S25**  $^{13}\text{C}$  NMR (400 MHz,  $\text{CDCl}_3$ , 25 °C) spectrum of polyisoprene catalyzed by **1-Tm** (Entry 21 in Table 1)

**Figure S26**  $^1\text{H}$  NMR (400 MHz,  $\text{CDCl}_3$ , 25 °C) spectrum of polybutadiene catalyzed by **1-Tm** (Entry 23 in Table 1)

**Figure S27**  $^{13}\text{C}$  NMR (400 MHz,  $\text{CDCl}_3$ , 25 °C) spectrum of polybutadiene catalyzed by **1-Tm** (Entry 23 in Table 1)

**Figure S28**  $^1\text{H}$  NMR (400 MHz,  $\text{CDCl}_3$ , 25 °C) spectrum of polyisoprene catalyzed by **1-Er** (Entry 25 in Table 1)

**Figure S29**  $^{13}\text{C}$  NMR (400 MHz,  $\text{CDCl}_3$ , 25 °C) spectrum of polyisoprene catalyzed by **1-Er** (Entry 25 in Table 1)

**Figure S30**  $^1\text{H}$  NMR (400 MHz,  $\text{CDCl}_3$ , 25 °C) spectrum of polybutadiene catalyzed by **1-Er** (Entry 27 in Table 1)

**Figure S31**  $^{13}\text{C}$  NMR (400 MHz,  $\text{CDCl}_3$ , 25 °C) spectrum of polybutadiene catalyzed by **1-Er** (Entry 27 in Table 1)

**Figure S32**  $^1\text{H}$  NMR (400 MHz,  $\text{CDCl}_3$ , 25 °C) spectrum of polyisoprene catalyzed by **1-Ho** (Entry 29 in Table 1)

**Figure S33**  $^{13}\text{C}$  NMR (400 MHz,  $\text{CDCl}_3$ , 25 °C) spectrum of polyisoprene catalyzed by **1-Ho** (Entry 29 in Table 1)

**Figure S34**  $^1\text{H}$  NMR (400 MHz,  $\text{CDCl}_3$ , 25 °C) spectrum of polybutadiene catalyzed by **1-Ho** (Entry 31 in Table 1)

**Figure S35**  $^{13}\text{C}$  NMR (400 MHz,  $\text{CDCl}_3$ , 25 °C) spectrum of polybutadiene catalyzed by **1-Ho** (Entry 31 in Table 1)

**Figure S36**  $^1\text{H}$  NMR (400 MHz,  $\text{CDCl}_3$ , 25 °C) spectrum of copolymer **P-1** catalyzed by **1-Y** (Entry 1 in Table 2)

**Figure S37**  $^{13}\text{C}$  NMR (400MHz,  $\text{CDCl}_3$ , 25 °C) spectrum of copolymer **P-1** catalyzed by **1-Y** (Entry 1 in Table 2)

**Figure S38**  $^1\text{H}$  NMR (400 MHz,  $\text{CDCl}_3$ , 25 °C) spectrum of copolymer **P-2** catalyzed by **1-Y** (Entry 2 in Table 2)

**Figure S39**  $^{13}\text{C}$  NMR (400 MHz,  $\text{CDCl}_3$ , 25 °C) spectrum of copolymer **P-2** catalyzed by **1-Y** (Entry 2 in Table 2)

**Figure S40**  $^1\text{H}$  NMR (400 MHz,  $\text{CDCl}_3$ , 25 °C) spectrum of copolymer **P-3** catalyzed by **1-Y** (Entry 3 in Table 2)

**Figure S41**  $^{13}\text{C}$  NMR (400 MHz,  $\text{CDCl}_3$ , 25 °C) spectrum of copolymer **P-3** catalyzed by **1-Y** (Entry 3 in Table 2)

**Figure S42**  $^1\text{H}$  NMR (400 MHz,  $\text{CDCl}_3$ , 25 °C) spectrum of copolymer **P-4** catalyzed by **1-Y** (Entry 4 in Table 2)

**Figure S43**  $^{13}\text{C}$  NMR (400 MHz,  $\text{CDCl}_3$ , 25 °C) spectrum of copolymer **P-4** catalyzed by **1-Y** (Entry 4 in Table 2)

**Figure S44**  $^1\text{H}$  NMR (400 MHz,  $\text{CDCl}_3$ , 25 °C) spectrum of copolymer **P-5** catalyzed by **1-Y** (Entry 5 in Table 2)

**Figure S45**  $^{13}\text{C}$  NMR (400 MHz,  $\text{CDCl}_3$ , 25 °C) spectrum of copolymer **P-5** catalyzed by **1-Y** (Entry 5 in Table 2)

**Figure S46**  $^1\text{H}$  NMR (400 MHz,  $\text{CDCl}_3$ , 25 °C) spectrum of copolymer **P-6** catalyzed by **1-Y** (Entry 6 in Table 2)

**Figure S47**  $^{13}\text{C}$  NMR (400 MHz,  $\text{CDCl}_3$ , 25 °C) spectrum of copolymer **P-6** catalyzed by **1-Y** (Entry 6 in Table 2)

**Figure S48**  $^1\text{H}$  NMR (400 MHz,  $\text{CDCl}_3$ , 25 °C) spectrum of copolymer **P-7** catalyzed by **1-Y** (Entry 7 in Table 2)

**Figure S49**  $^{13}\text{C}$  NMR (400 MHz,  $\text{CDCl}_3$ , 25 °C) spectrum of copolymer **P-7** catalyzed by **1-Y** (Entry 7 in Table 2)

**Table S1** The data for Fineman-Ross diagram

**Table S2** The data for content of isoprene and butadiene in the copolymers versus the conversions

**Figure S50** DSC curves of highly *trans*-1,4-PBD

**Figure S51** DSC curves of copolymers after hydrogenation

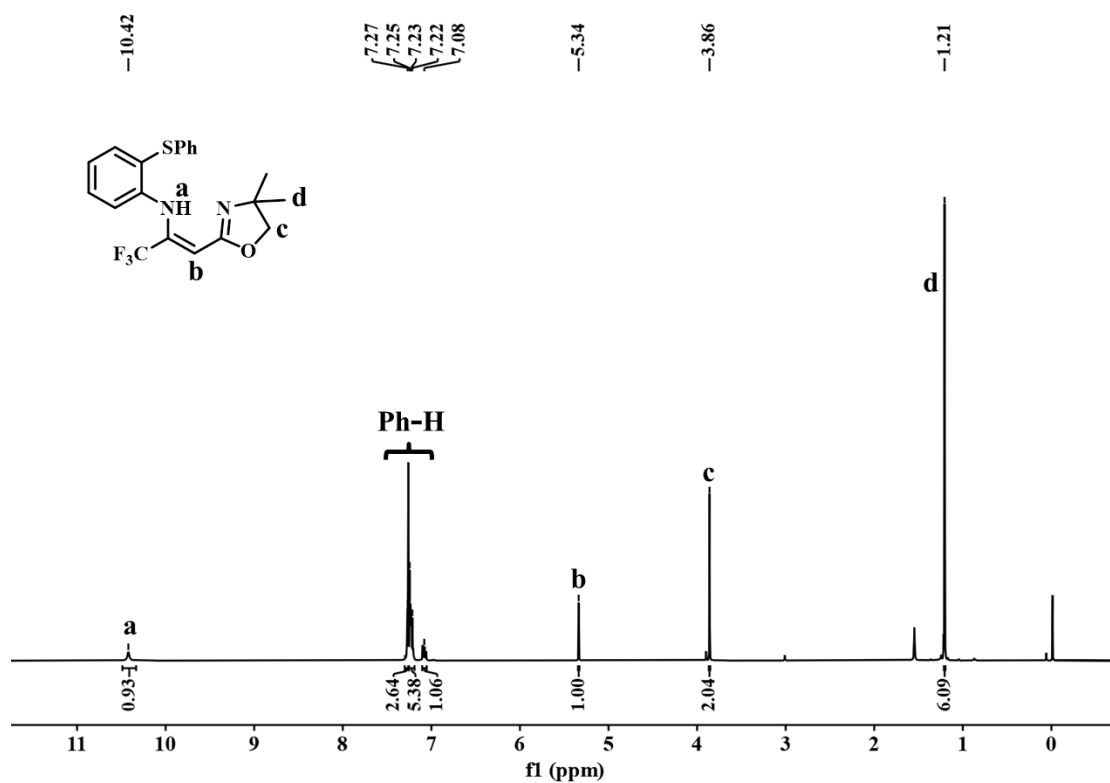

Figure S1 <sup>1</sup>H NMR spectrum of L1-H (400 MHz, CDCl<sub>3</sub>, 25 °C)

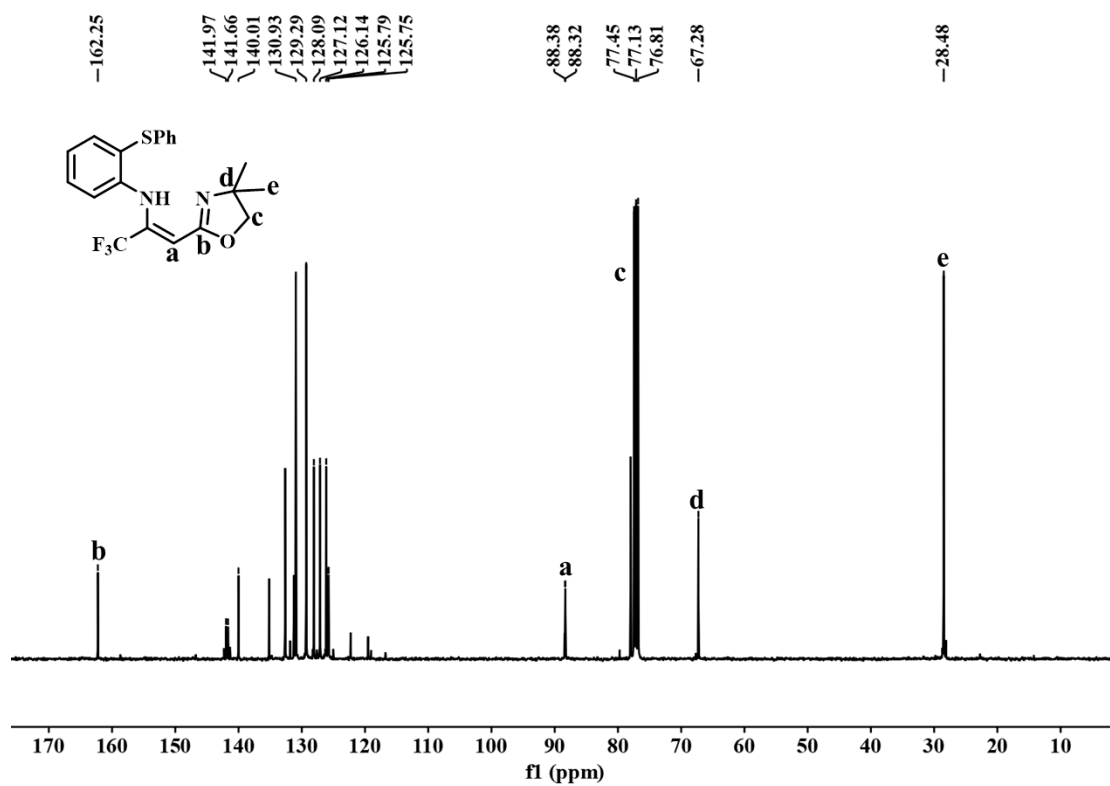

Figure S2 <sup>13</sup>C NMR spectrum of L1-H (400 MHz, CDCl<sub>3</sub>, 25 °C)

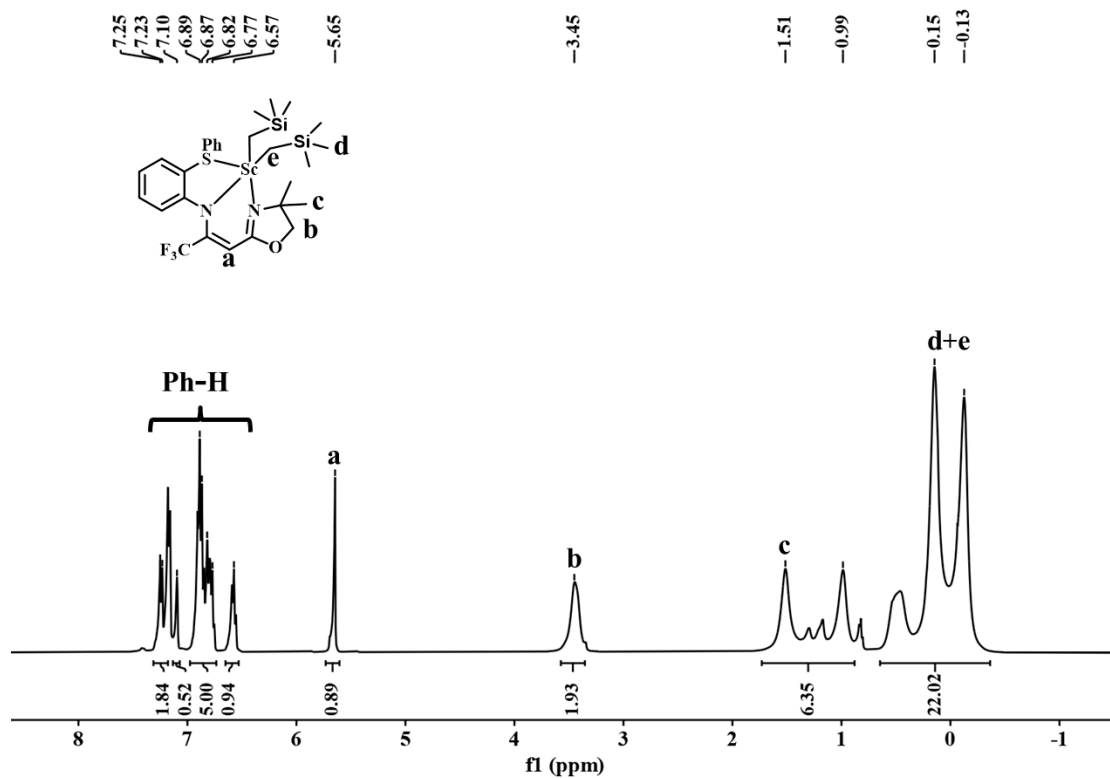

**Figure S3** <sup>1</sup>H NMR spectrum of **1-Sc** (400 MHz, C<sub>6</sub>D<sub>6</sub>, 25 °C)

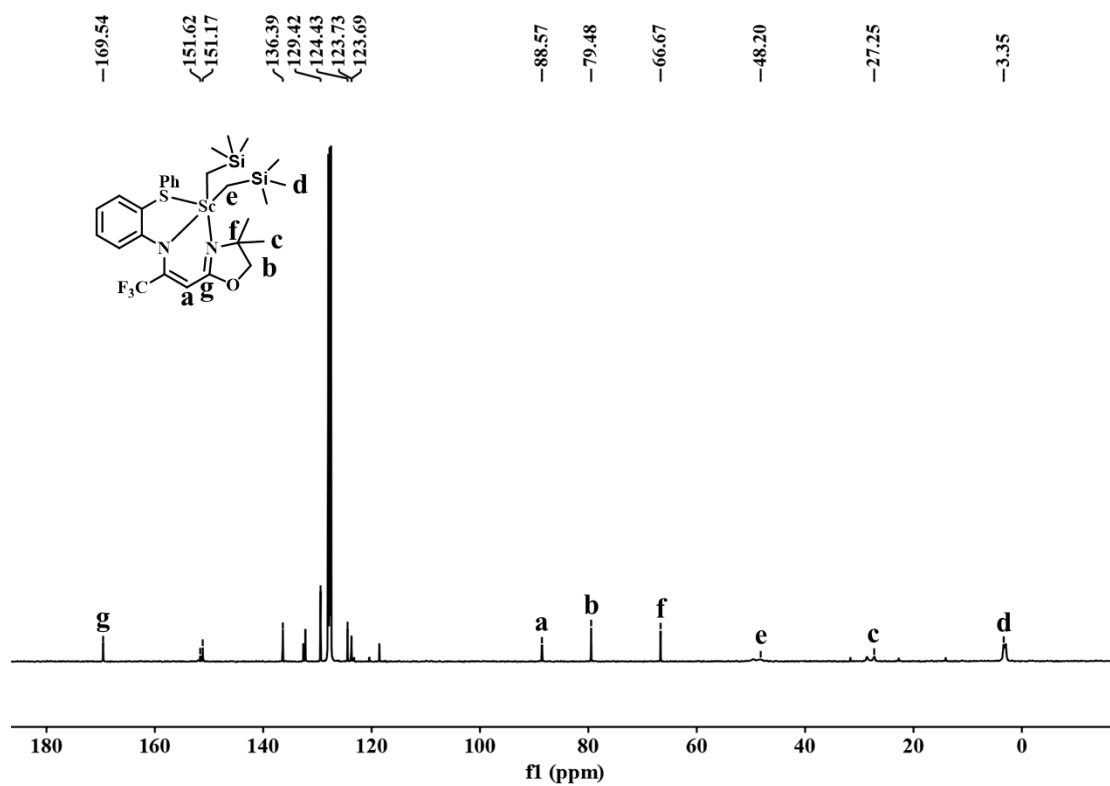

**Figure S4** <sup>13</sup>C NMR spectrum of **1-Sc** (400 MHz, C<sub>6</sub>D<sub>6</sub>, 25 °C)

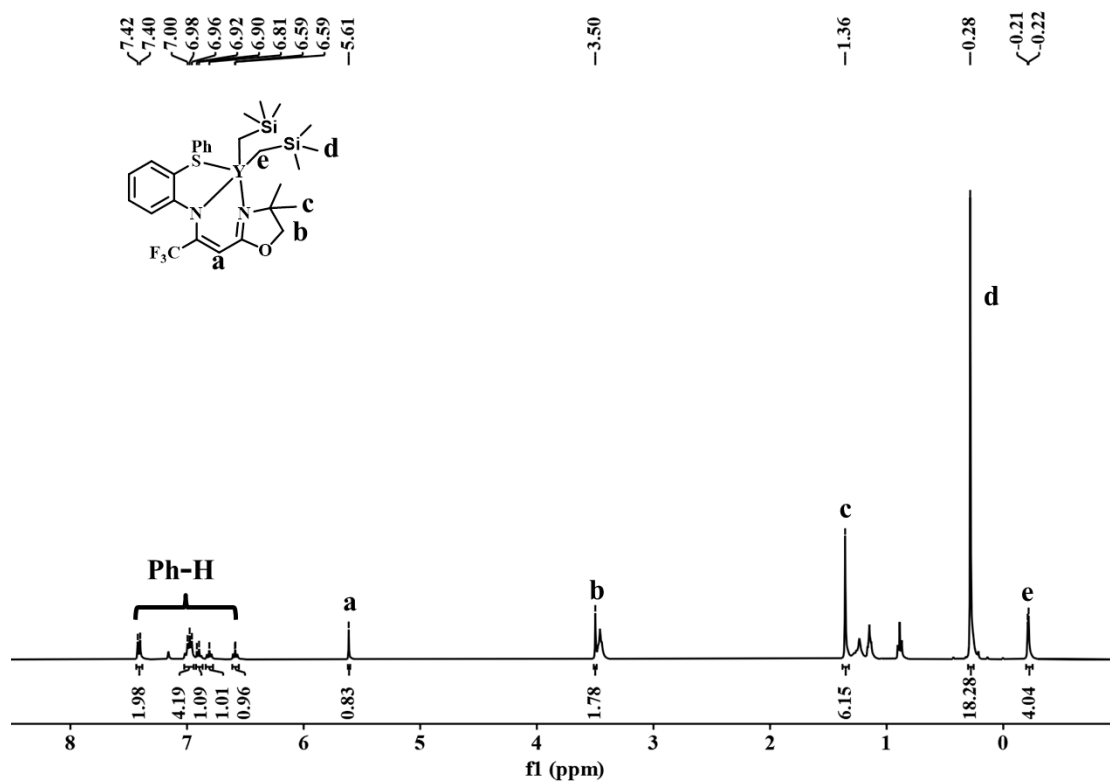

Figure S5 <sup>1</sup>H NMR spectrum of **1-Lu** (400 MHz, C<sub>6</sub>D<sub>6</sub>, 25 °C)

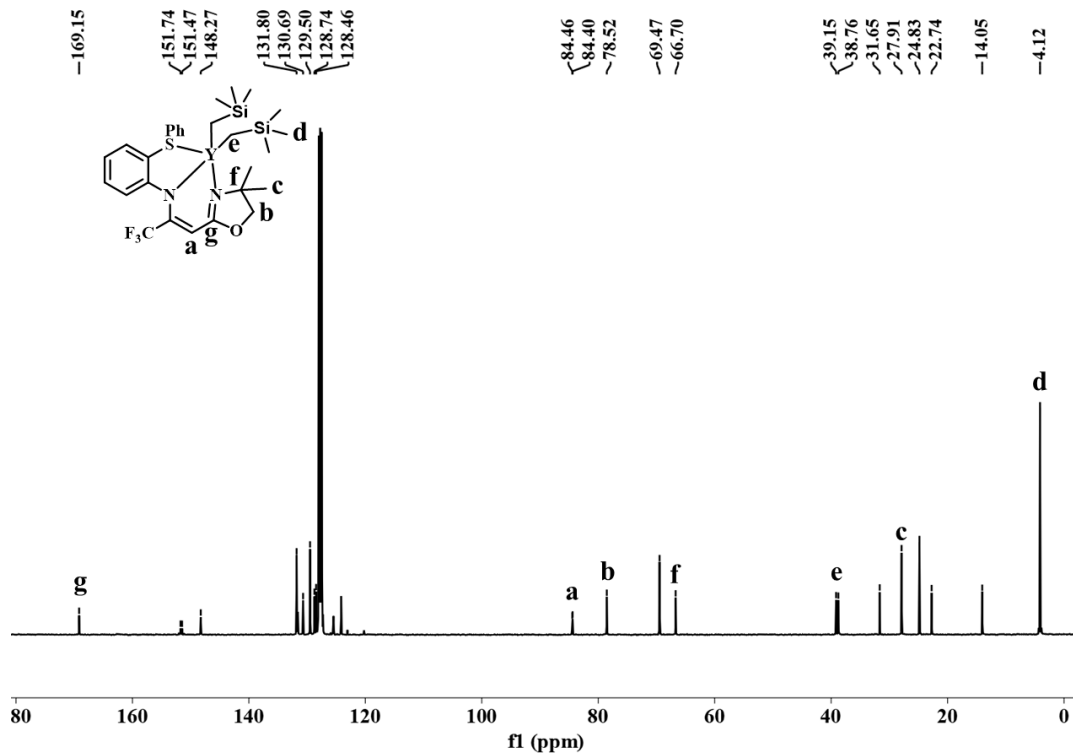

Figure S6 <sup>13</sup>C NMR spectrum of **1-Lu** (400 MHz, C<sub>6</sub>D<sub>6</sub>, 25 °C)

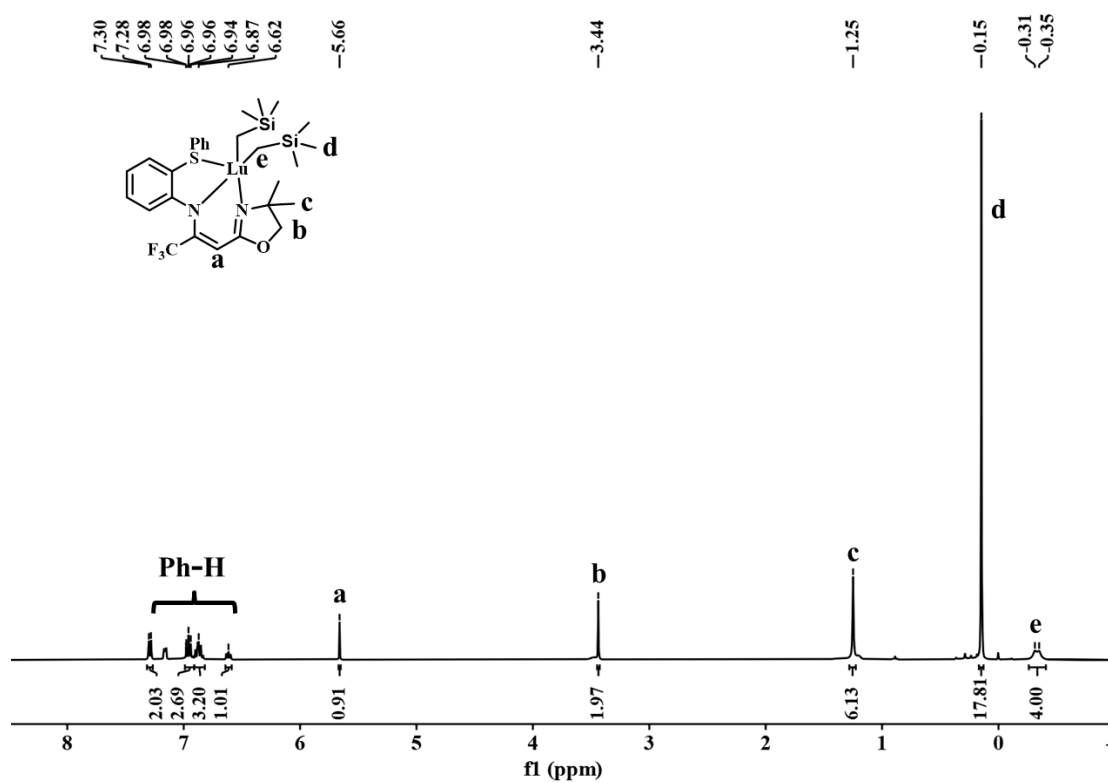

**Figure S7**  $^1\text{H}$  NMR spectrum of **1-Lu** (400 MHz,  $\text{C}_6\text{D}_6$ , 25 °C)

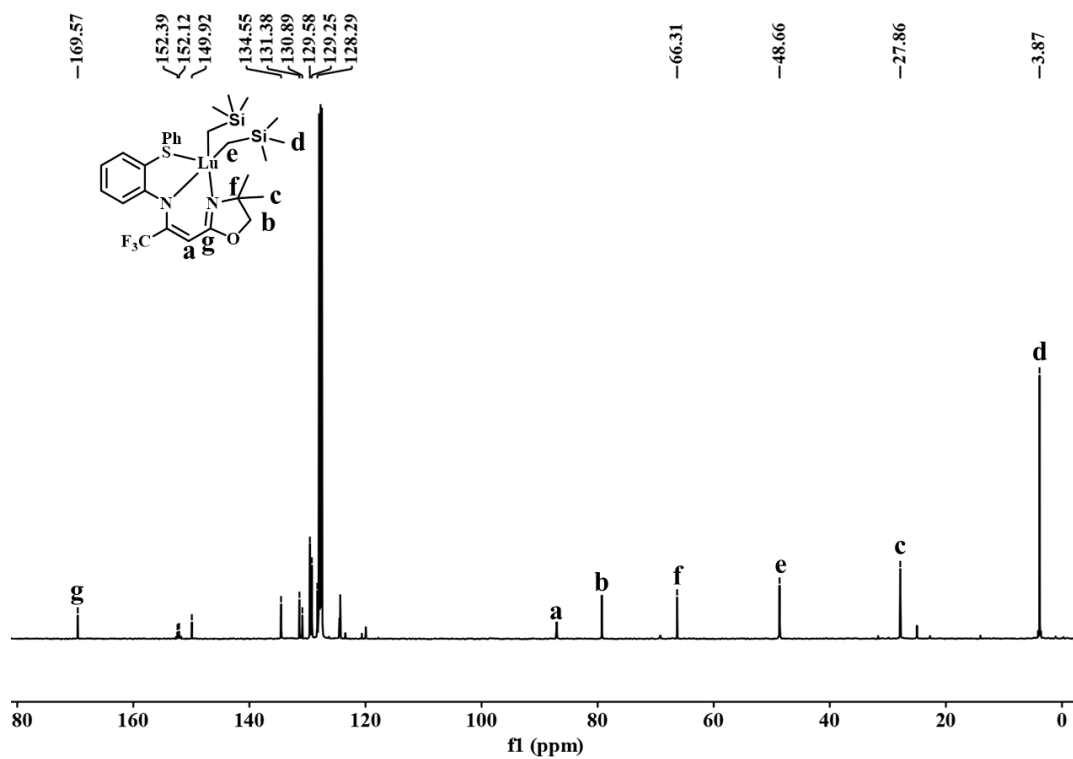

**Figure S8**  $^{13}\text{C}$  NMR spectrum of **1-Lu** (400 MHz,  $\text{C}_6\text{D}_6$ , 25 °C)



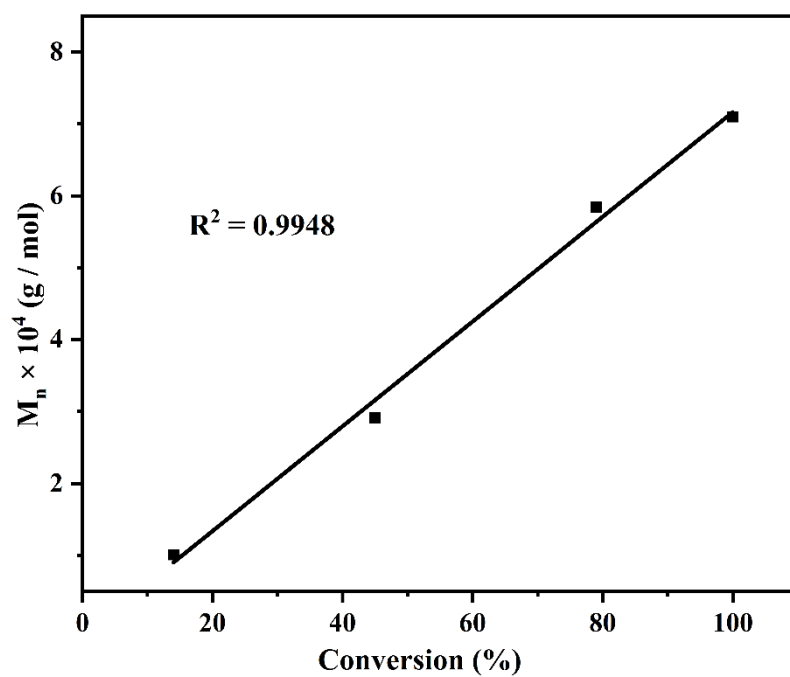

(a)

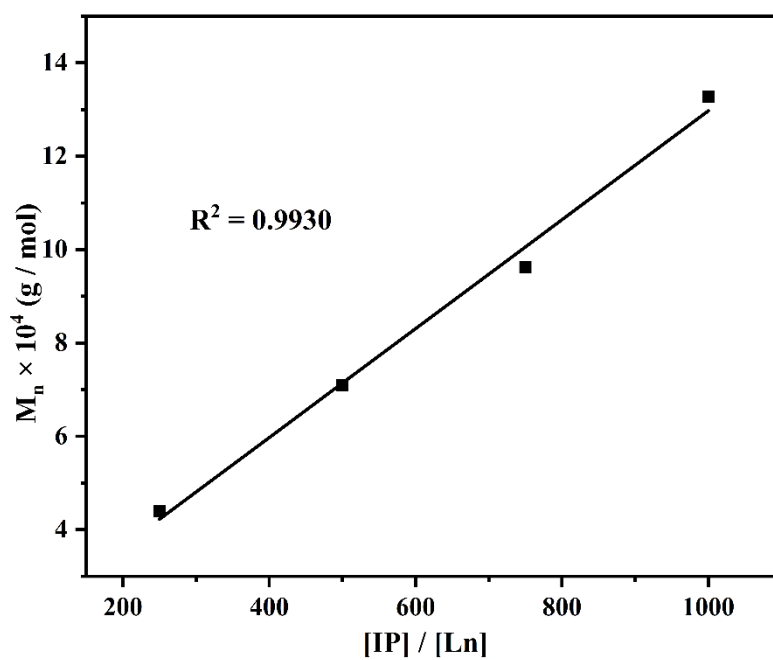

(b)

**Figure S9** (a) Polymerization of isoprene with **1-Y** /  $[(Ph_3C)(B(C_6F_5)_4)]$  as a precursor: molecular weight vs conversion. (b) Polymerization of isoprene with **1-Y** /  $[(Ph_3C)(B(C_6F_5)_4)]$  as a precursor: molecular weight vs isoprene-to-[**1-Y**] ratio.

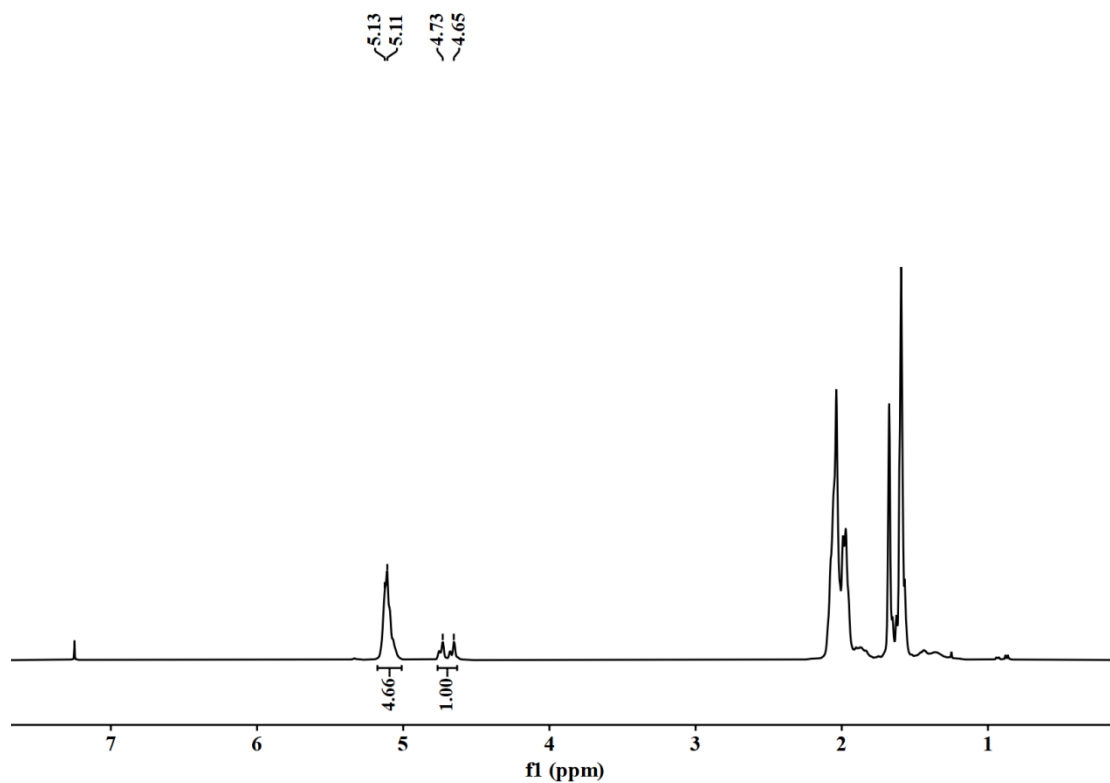

**Figure S10**  $^1\text{H}$  NMR (400 MHz,  $\text{CDCl}_3$ , 25  $^\circ\text{C}$ ) spectrum of polyisoprene catalyzed by **1-Sc** (Entry 1 in Table 1)

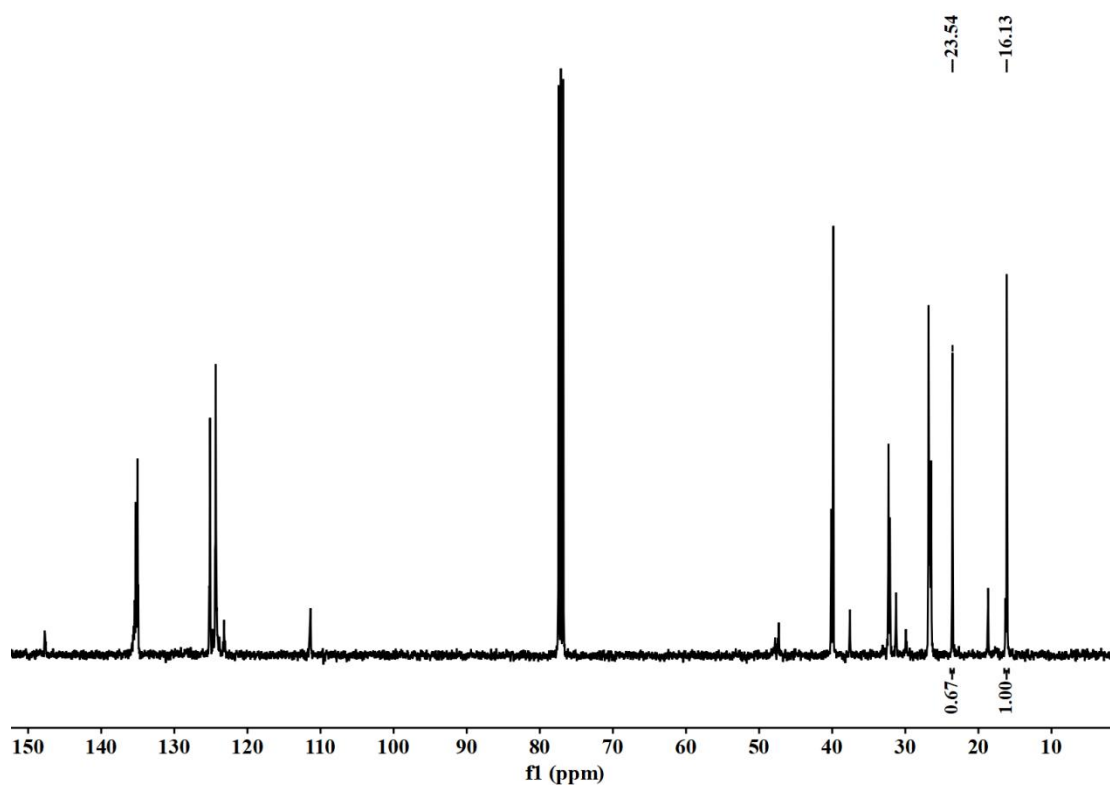

**Figure S11**  $^{13}\text{C}$  NMR (400 MHz,  $\text{CDCl}_3$ , 25  $^\circ\text{C}$ ) spectrum of polyisoprene catalyzed by **1-Sc** (Entry 1 in Table 1)

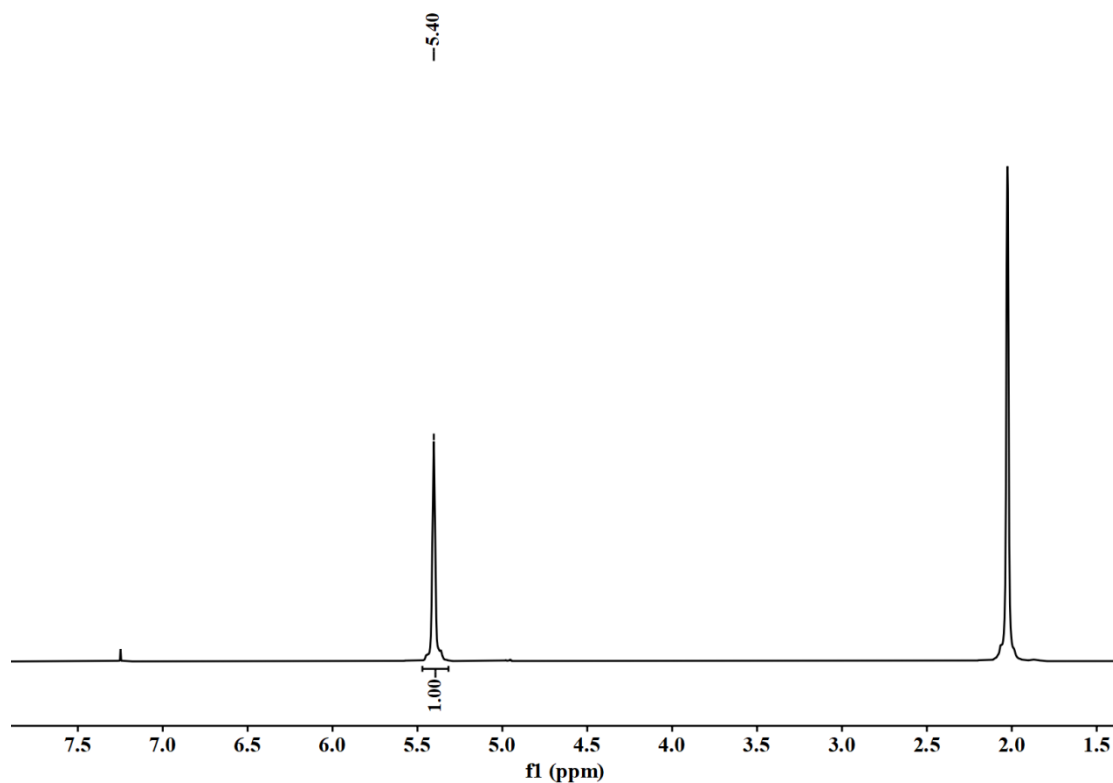

**Figure S12**  $^1\text{H}$  NMR (400 MHz,  $\text{CDCl}_3$ , 25  $^\circ\text{C}$ ) spectrum of polybutadiene catalyzed by **1-Sc** (Entry 3 in Table 1)

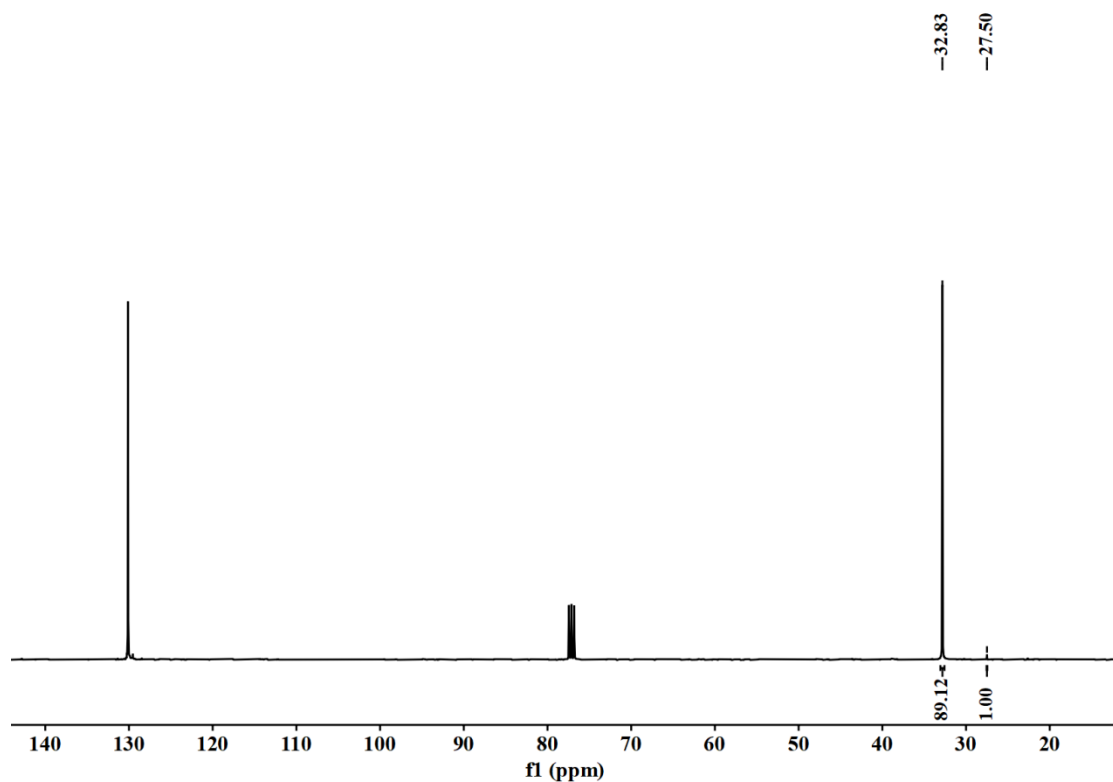

**Figure S13**  $^{13}\text{C}$  NMR (400 MHz,  $\text{CDCl}_3$ , 25  $^\circ\text{C}$ ) spectrum of polybutadiene catalyzed by **1-Sc** (Entry 3 in Table 1)

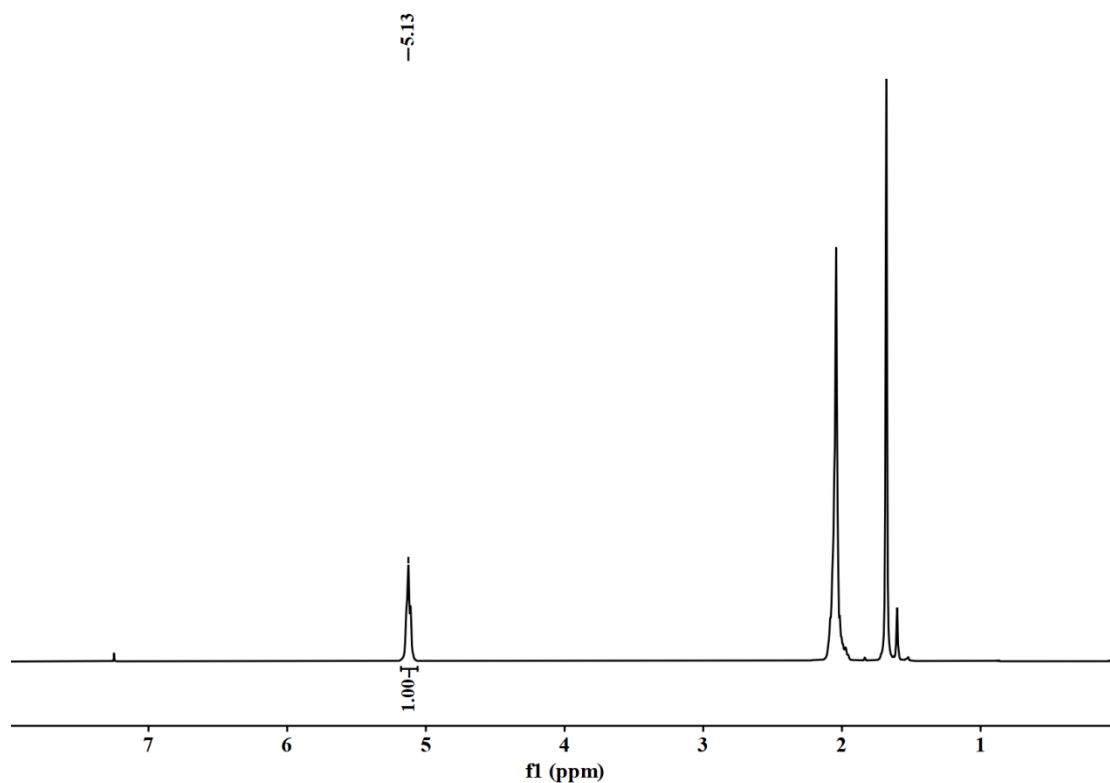

**Figure S14**  $^1\text{H}$  NMR (400 MHz,  $\text{CDCl}_3$ , 25  $^\circ\text{C}$ ) spectrum of polyisoprene catalyzed by **1-Y** (Entry 5 in Table 1)

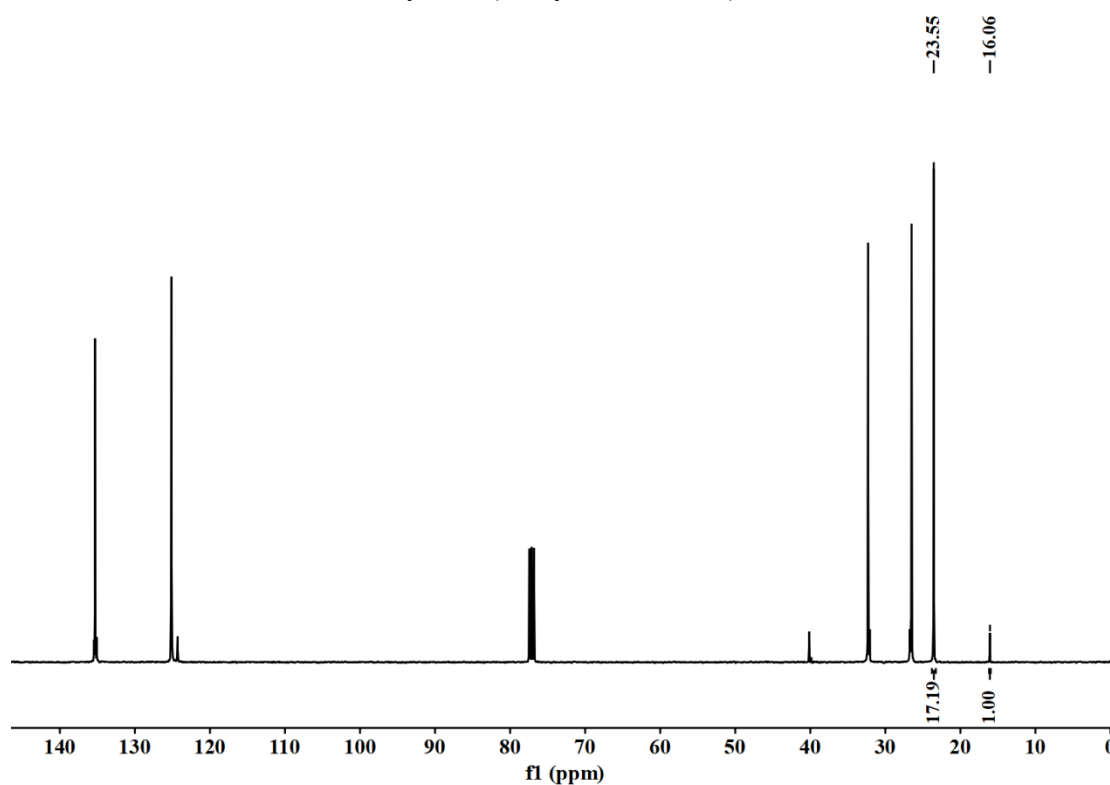

**Figure S15**  $^{13}\text{C}$  NMR (400 MHz,  $\text{CDCl}_3$ , 25  $^\circ\text{C}$ ) spectrum of polyisoprene catalyzed by **1-Y** (Entry 5 in Table 1)

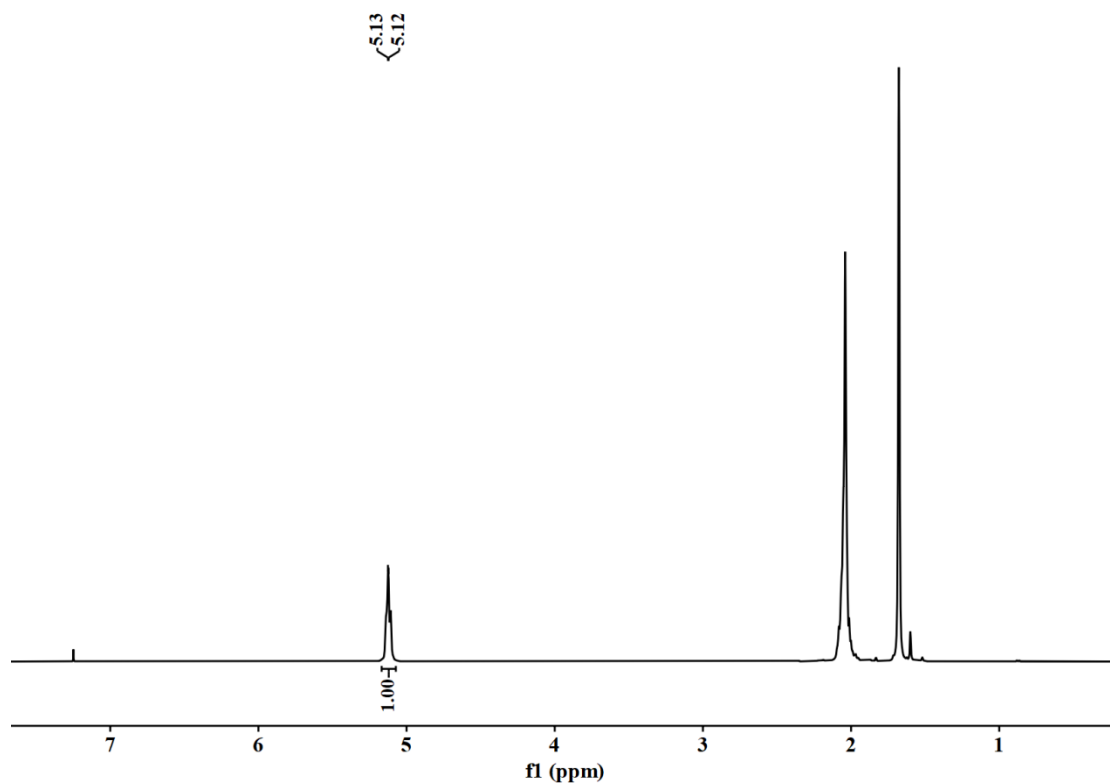

**Figure S16** <sup>1</sup>H NMR (400 MHz, CDCl<sub>3</sub>, 25 °C) spectrum of polyisoprene catalyzed by **1-Y**/[PhMe<sub>2</sub>NH][B(C<sub>6</sub>F<sub>5</sub>)<sub>4</sub>] (Entry 6 in Table 1)

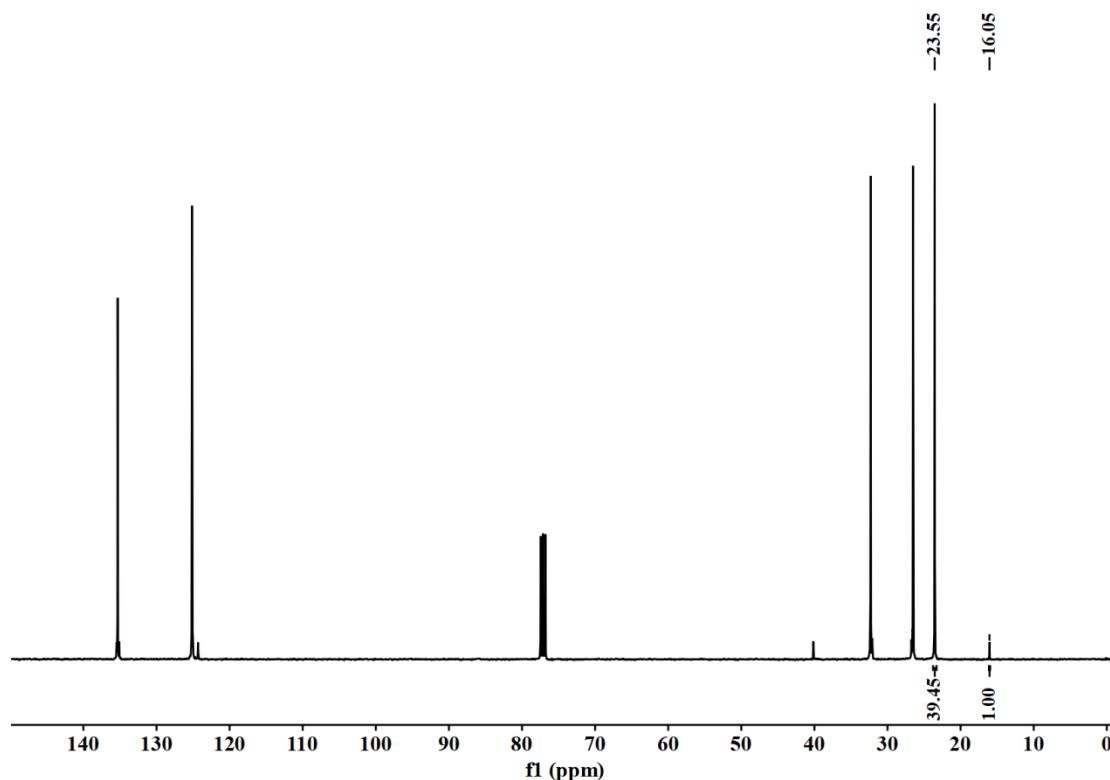

**Figure S17** <sup>13</sup>C NMR (400 MHz, CDCl<sub>3</sub>, 25 °C) spectrum of polyisoprene catalyzed by **1-Y**/[PhMe<sub>2</sub>NH][B(C<sub>6</sub>F<sub>5</sub>)<sub>4</sub>] (Entry 6 in Table 1)

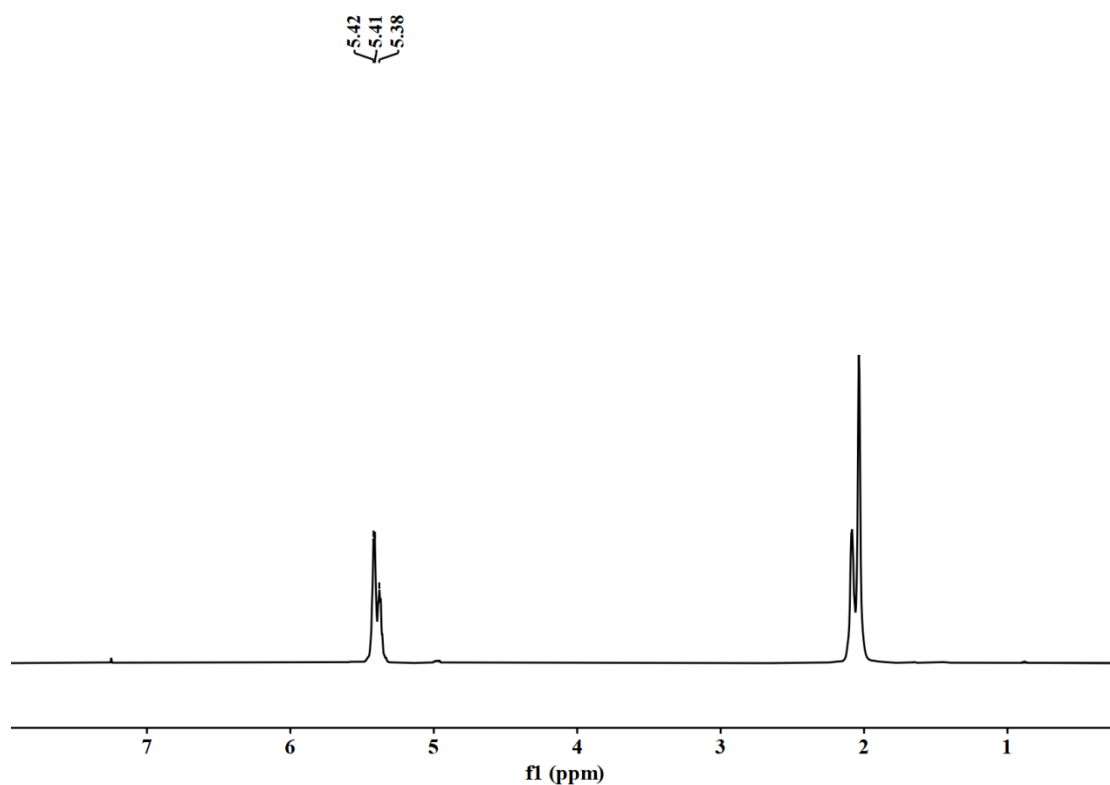

**Figure S18**  $^1\text{H}$  NMR (400 MHz,  $\text{CDCl}_3$ , 25  $^\circ\text{C}$ ) spectrum of polybutadiene catalyzed by **1-Y** (Entry 14 in Table 1)

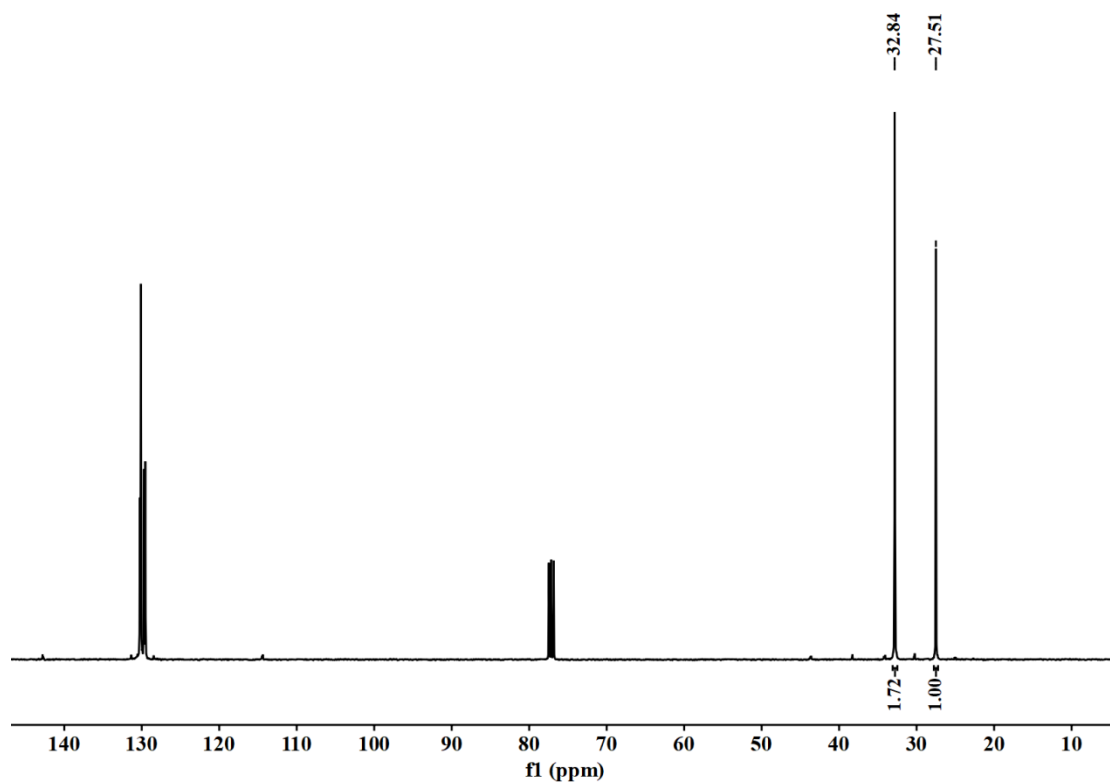

**Figure S19**  $^{13}\text{C}$  NMR (400 MHz,  $\text{CDCl}_3$ , 25  $^\circ\text{C}$ ) spectrum of polybutadiene catalyzed by **1-Y** (Entry 14 in Table 1)

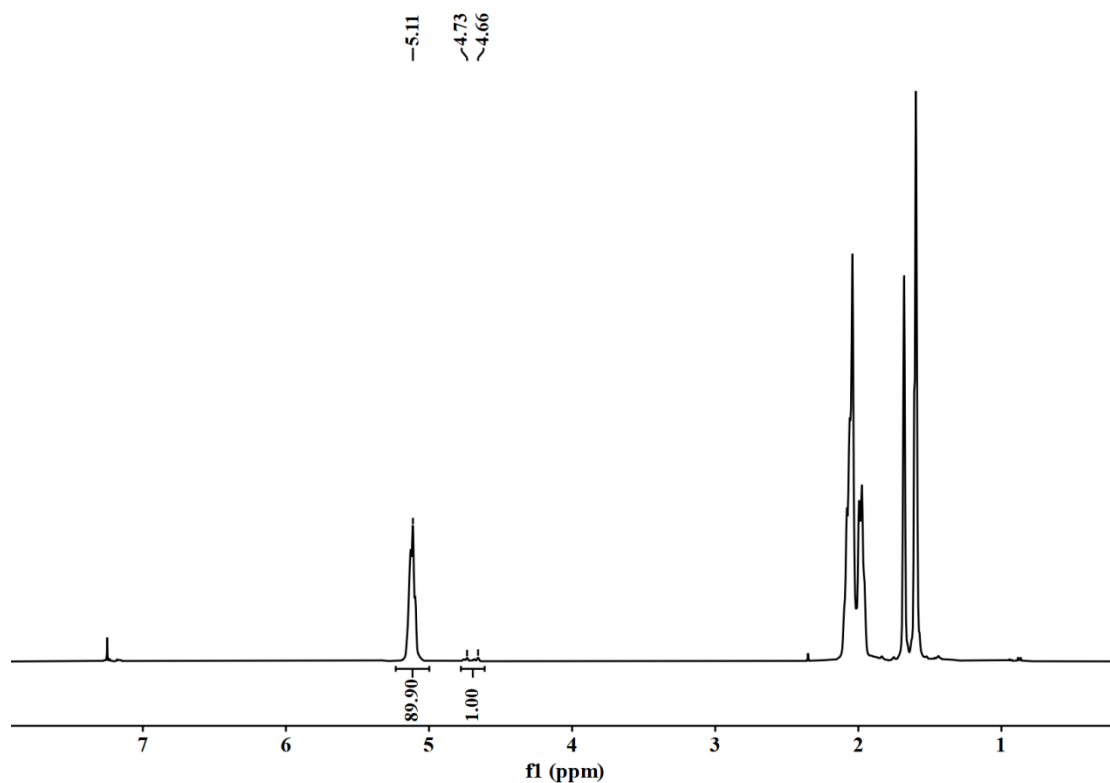

**Figure S20**  $^1\text{H}$  NMR (400 MHz,  $\text{CDCl}_3$ , 25  $^\circ\text{C}$ ) spectrum of polyisoprene catalyzed by **1-Lu** (Entry 17 in Table 1)

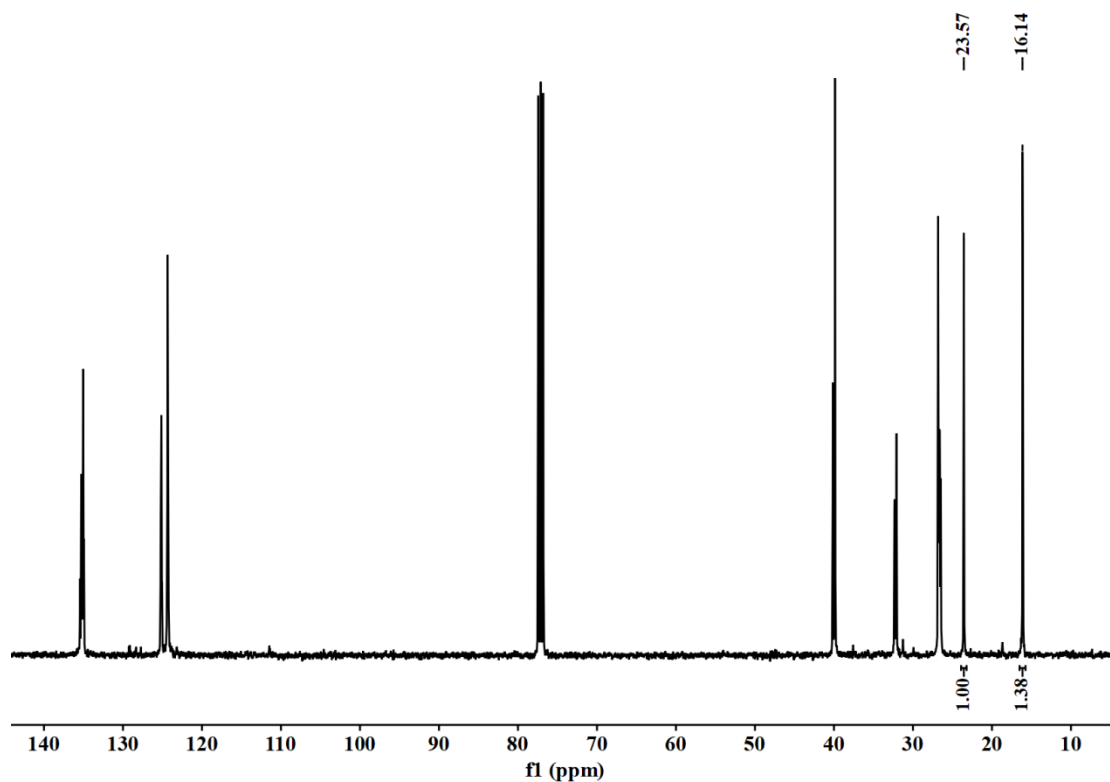

**Figure S21**  $^{13}\text{C}$  NMR (400 MHz,  $\text{CDCl}_3$ , 25  $^\circ\text{C}$ ) spectrum of polyisoprene catalyzed by **1-Lu** (Entry 17 in Table 1)

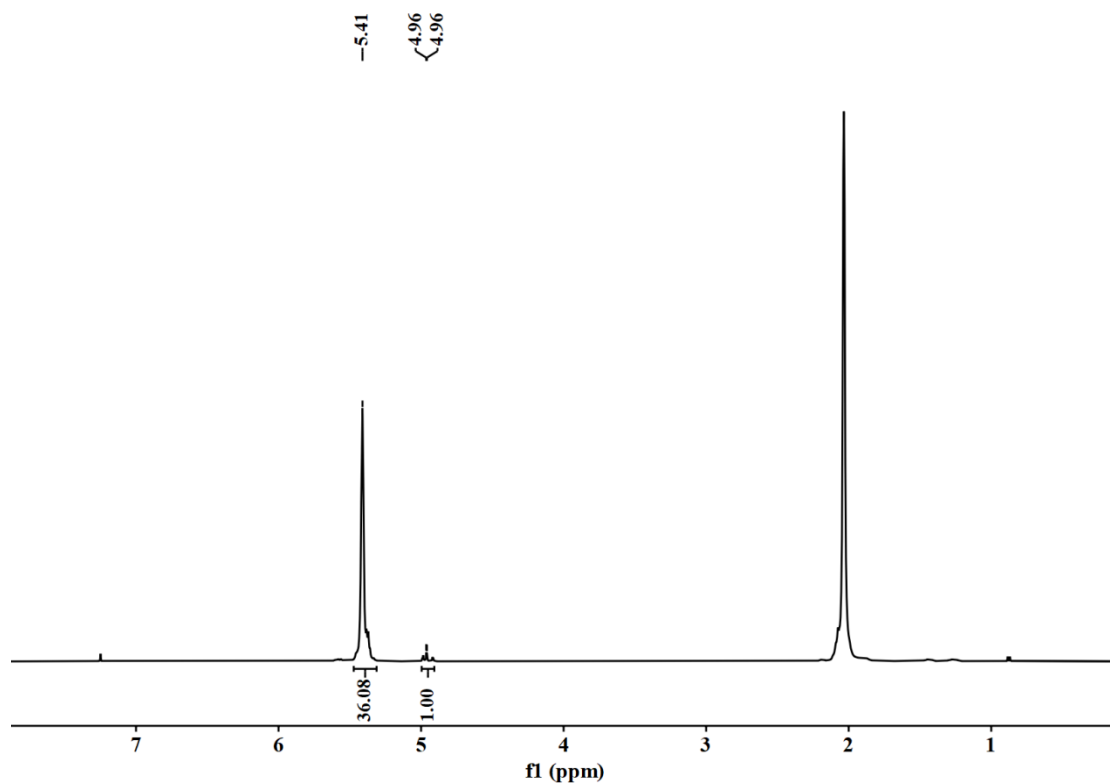

**Figure S22**  $^1\text{H}$  NMR (400 MHz,  $\text{CDCl}_3$ , 25  $^\circ\text{C}$ ) spectrum of polybutadiene catalyzed by **1-Lu** (Entry 19 in Table 1)

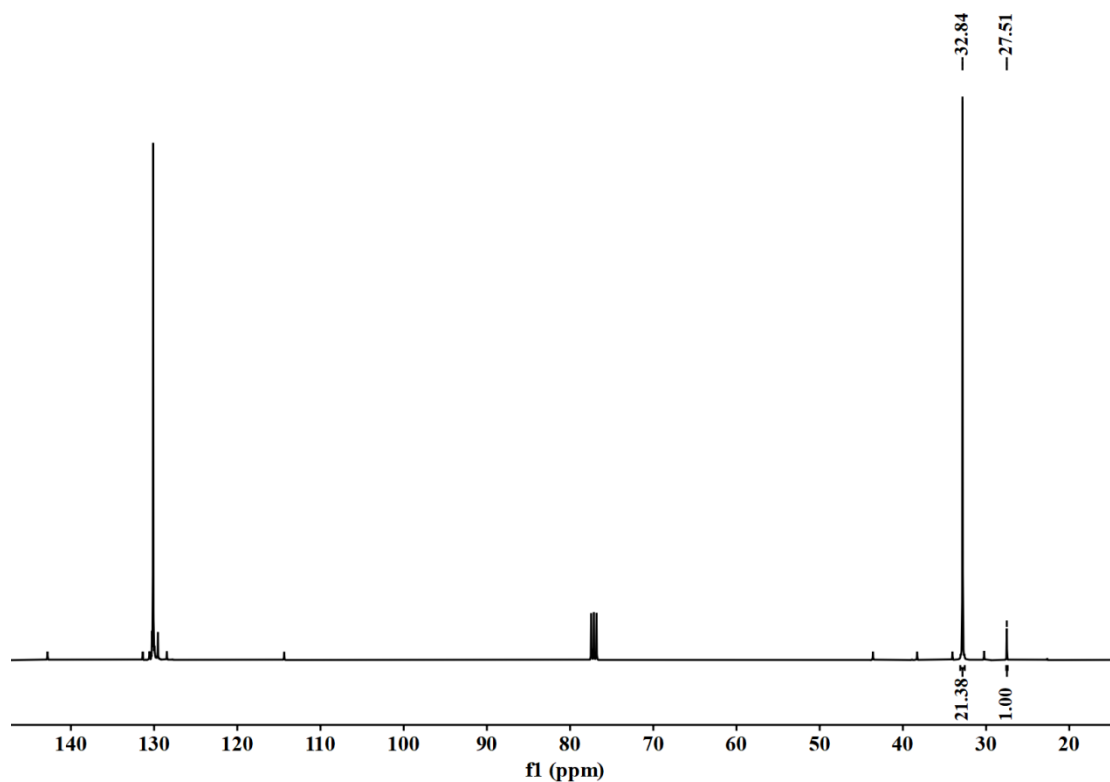

**Figure S23**  $^{13}\text{C}$  NMR (400 MHz,  $\text{CDCl}_3$ , 25  $^\circ\text{C}$ ) spectrum of polybutadiene catalyzed by **1-Lu** (Entry 19 in Table 1)



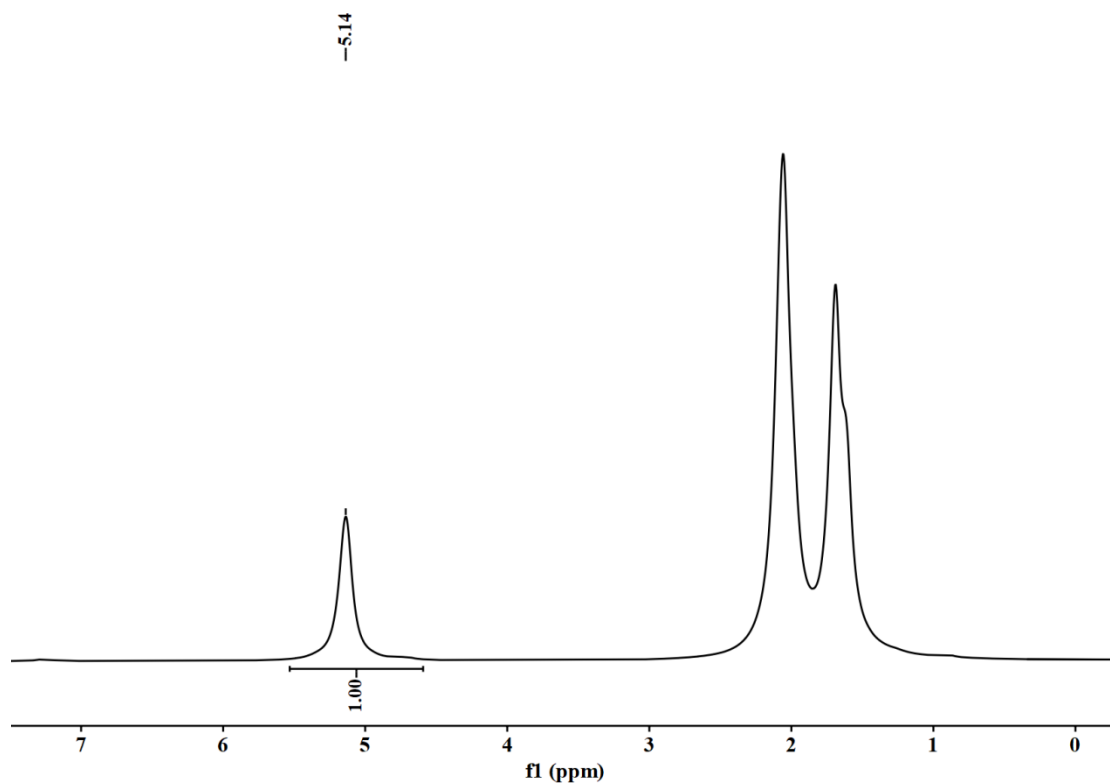

**Figure S24**  $^1\text{H}$  NMR (400 MHz,  $\text{CDCl}_3$ , 25  $^\circ\text{C}$ ) spectrum of polyisoprene catalyzed by **1-Tm** (Entry 21 in Table 1)

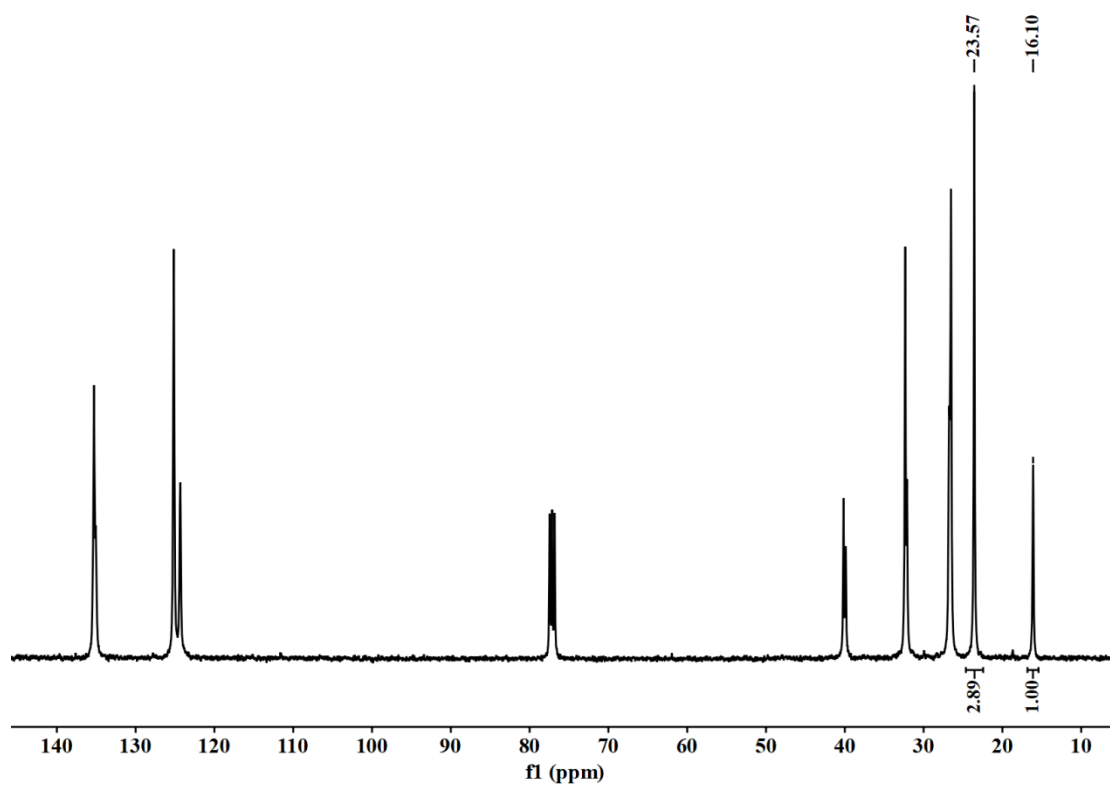

**Figure S25**  $^{13}\text{C}$  NMR (400 MHz,  $\text{CDCl}_3$ , 25  $^\circ\text{C}$ ) spectrum of polyisoprene catalyzed by **1-Tm** (Entry 21 in Table 1)

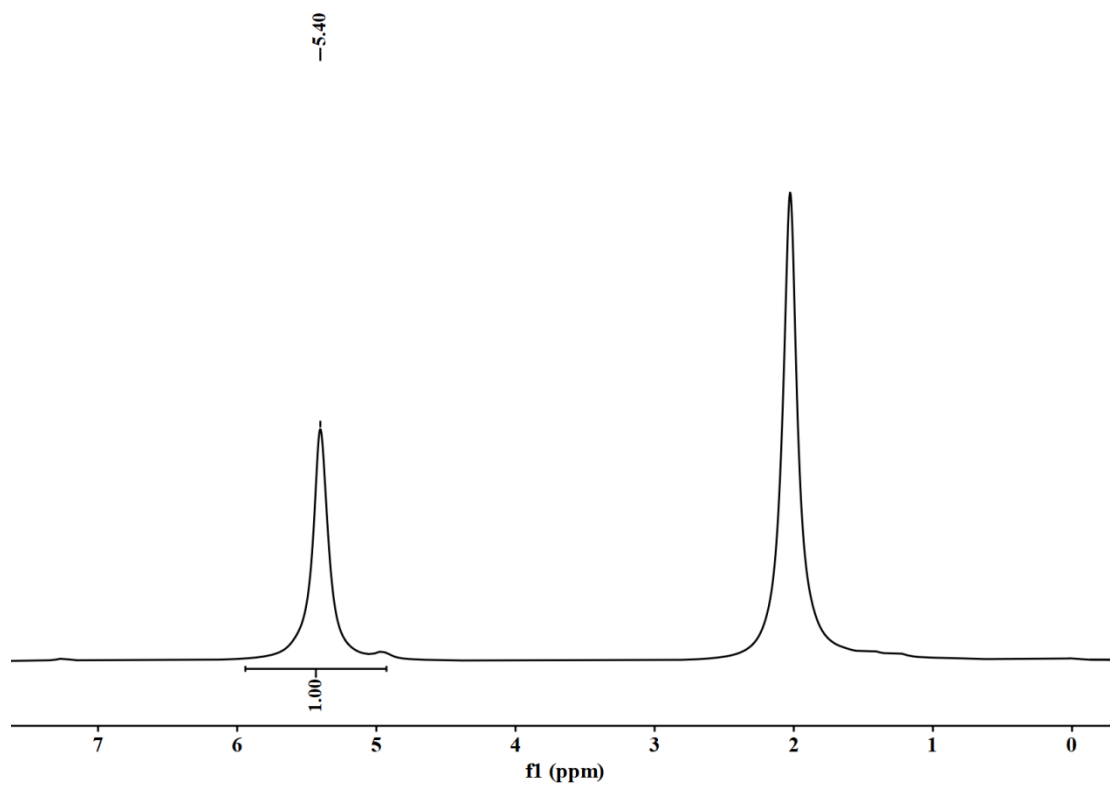

**Figure S26**  $^1\text{H}$  NMR (400 MHz,  $\text{CDCl}_3$ , 25  $^\circ\text{C}$ ) spectrum of polybutadiene catalyzed by **1-Tm** (Entry 23 in Table 1)

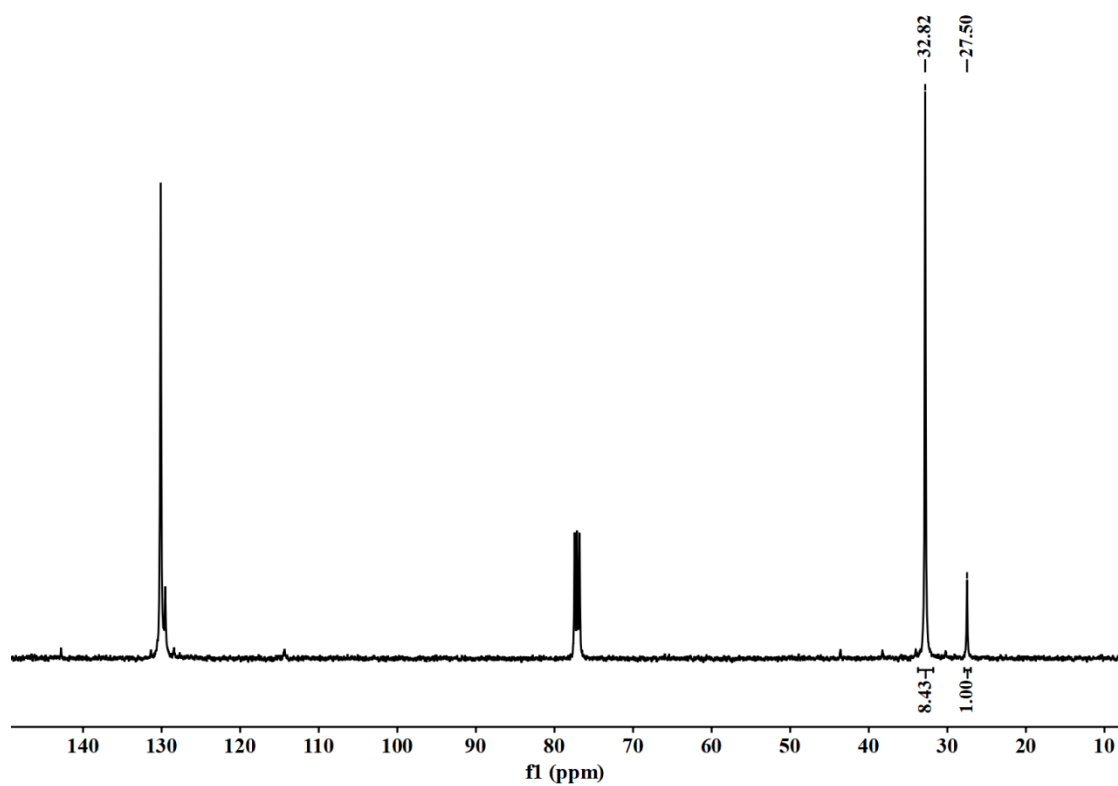

**Figure S27**  $^{13}\text{C}$  NMR (400 MHz,  $\text{CDCl}_3$ , 25  $^\circ\text{C}$ ) spectrum of polybutadiene catalyzed by **1-Tm** (Entry 23 in Table 1)

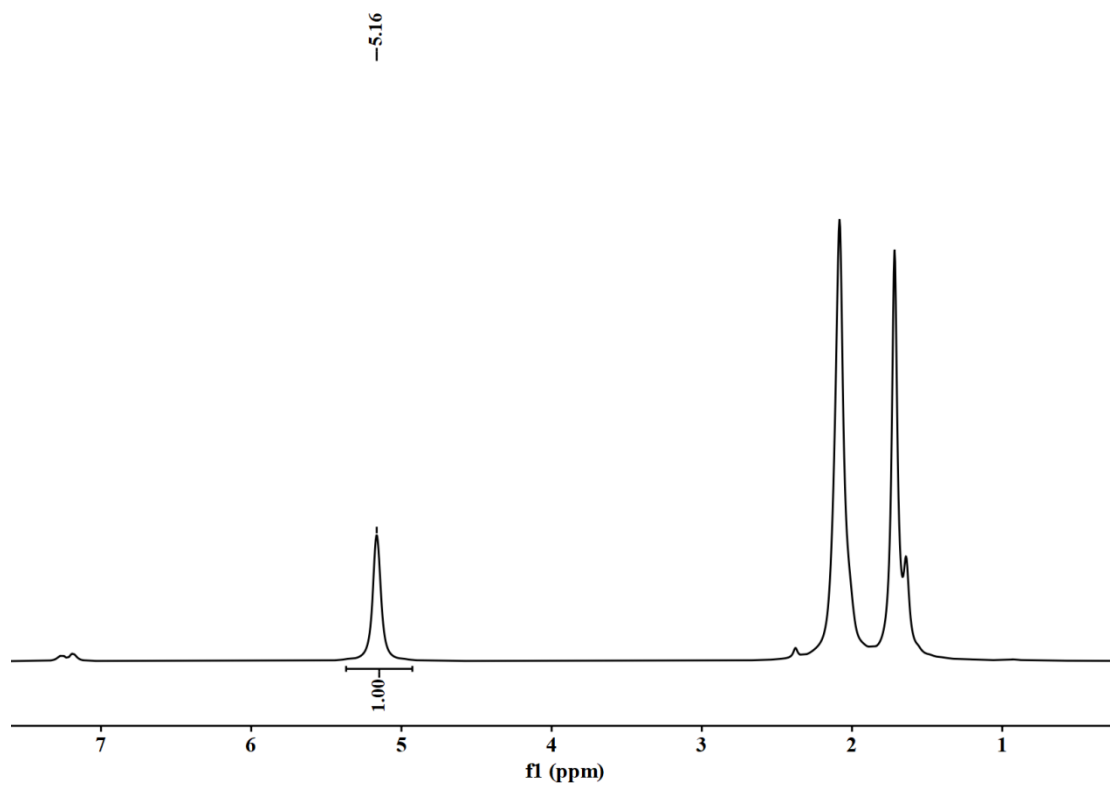

**Figure S28**  $^1\text{H}$  NMR (400 MHz,  $\text{CDCl}_3$ , 25  $^\circ\text{C}$ ) spectrum of polyisoprene catalyzed by **1-Er** (Entry 25 in Table 1)

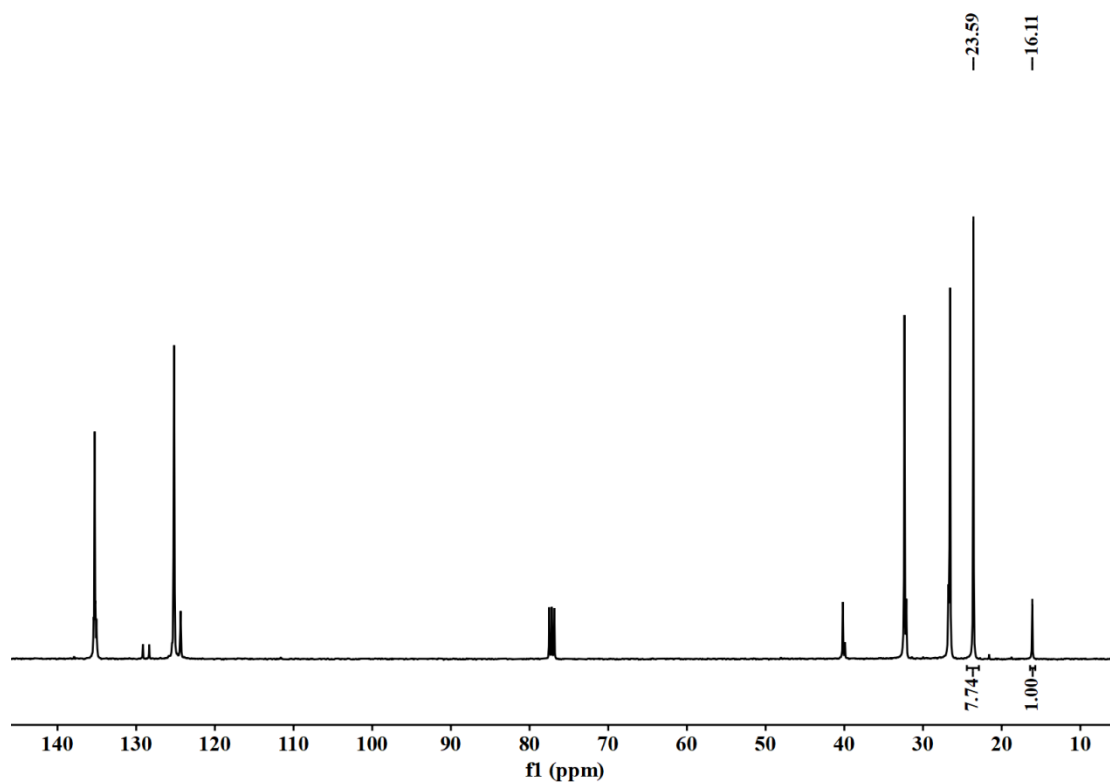

**Figure S29**  $^{13}\text{C}$  NMR (400 MHz,  $\text{CDCl}_3$ , 25  $^\circ\text{C}$ ) spectrum of polyisoprene catalyzed by **1-Er** (Entry 25 in Table 1)

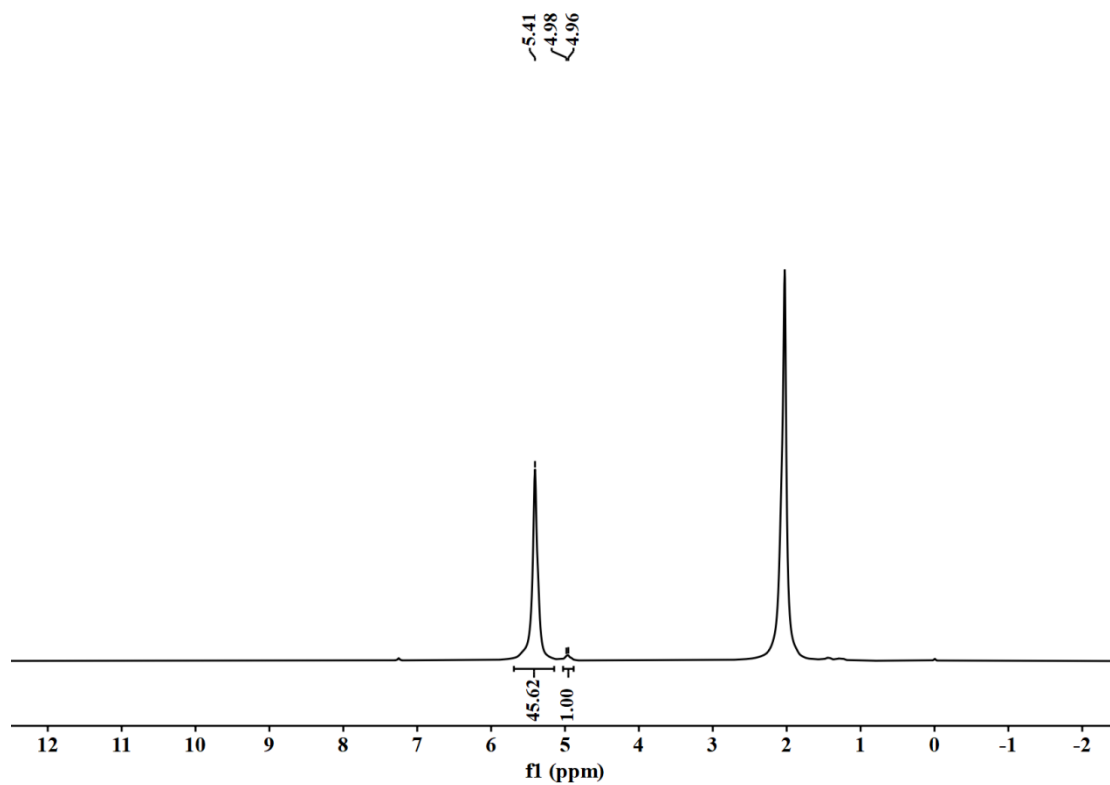

**Figure S30**  $^1\text{H}$  NMR (400 MHz,  $\text{CDCl}_3$ , 25  $^\circ\text{C}$ ) spectrum of polybutadiene catalyzed by **1-Er** (Entry 27 in Table 1)

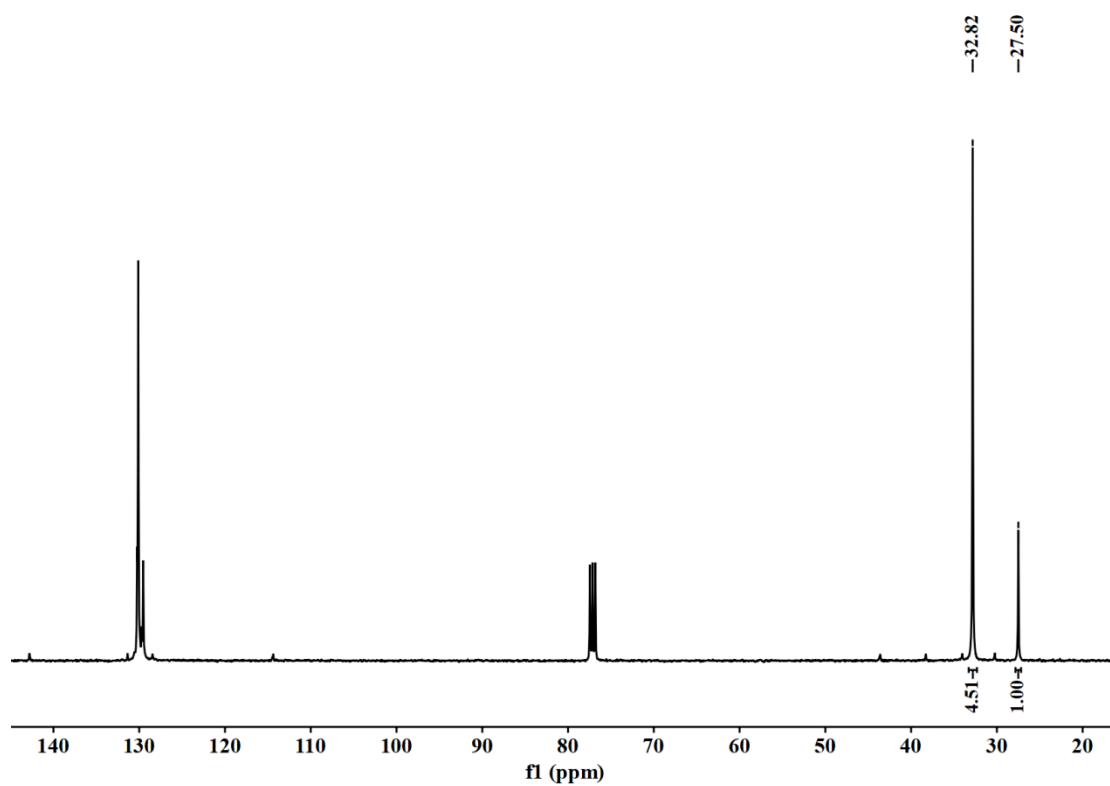

**Figure S31**  $^{13}\text{C}$  NMR (400 MHz,  $\text{CDCl}_3$ , 25  $^\circ\text{C}$ ) spectrum of polybutadiene catalyzed by **1-Er** (Entry 27 in Table 1)

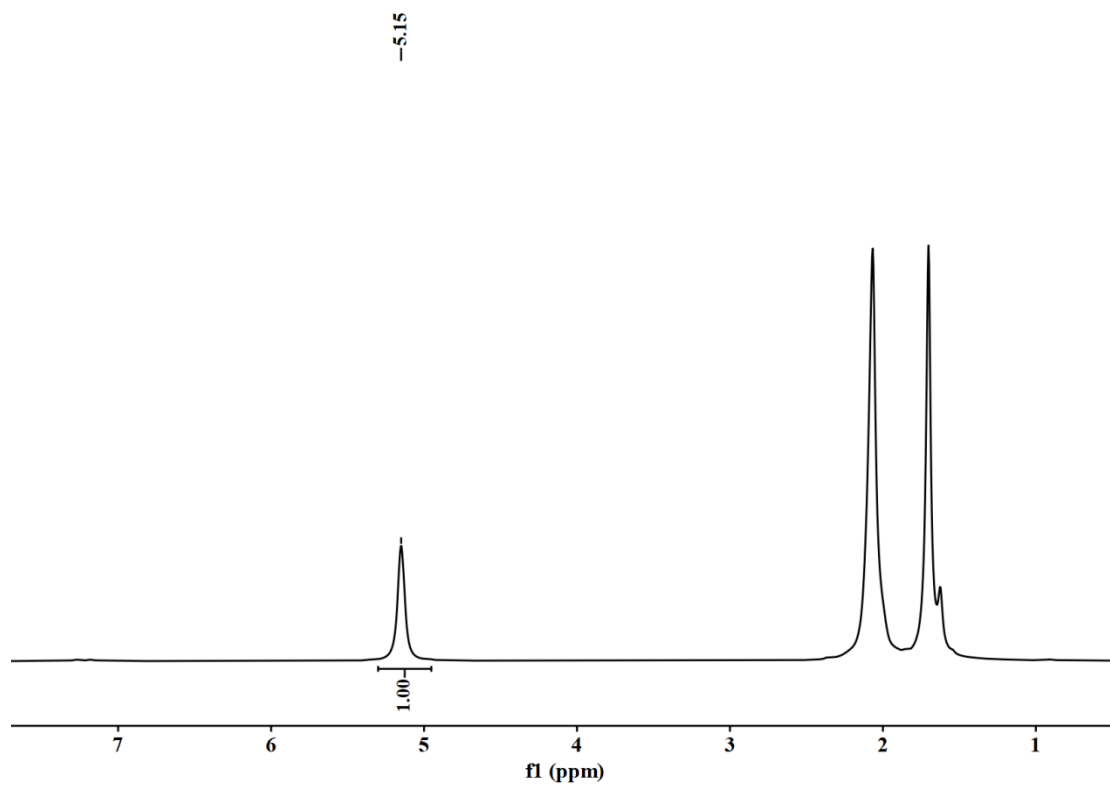

**Figure S32**  $^1\text{H}$  NMR (400 MHz,  $\text{CDCl}_3$ , 25  $^\circ\text{C}$ ) spectrum of polyisoprene catalyzed by **1-Ho** (Entry 29 in Table 1)

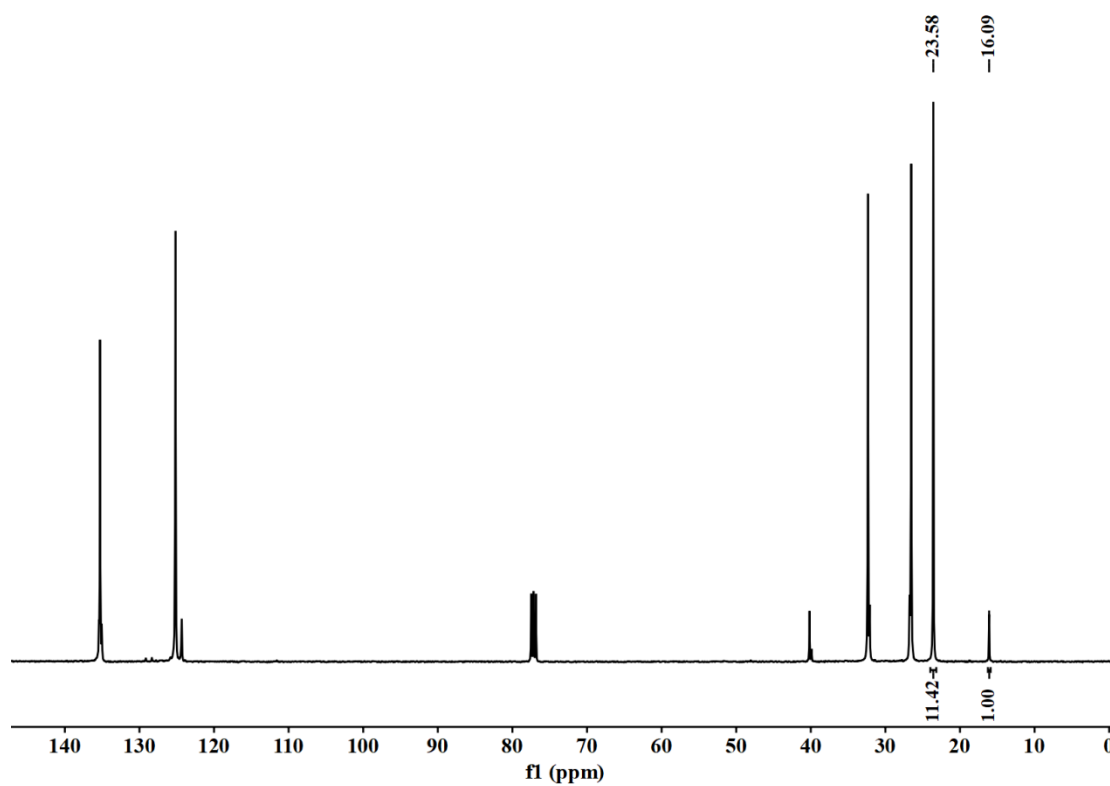

**Figure S33**  $^{13}\text{C}$  NMR (400 MHz,  $\text{CDCl}_3$ , 25  $^\circ\text{C}$ ) spectrum of polyisoprene catalyzed by **1-Ho** (Entry 29 in Table 1)

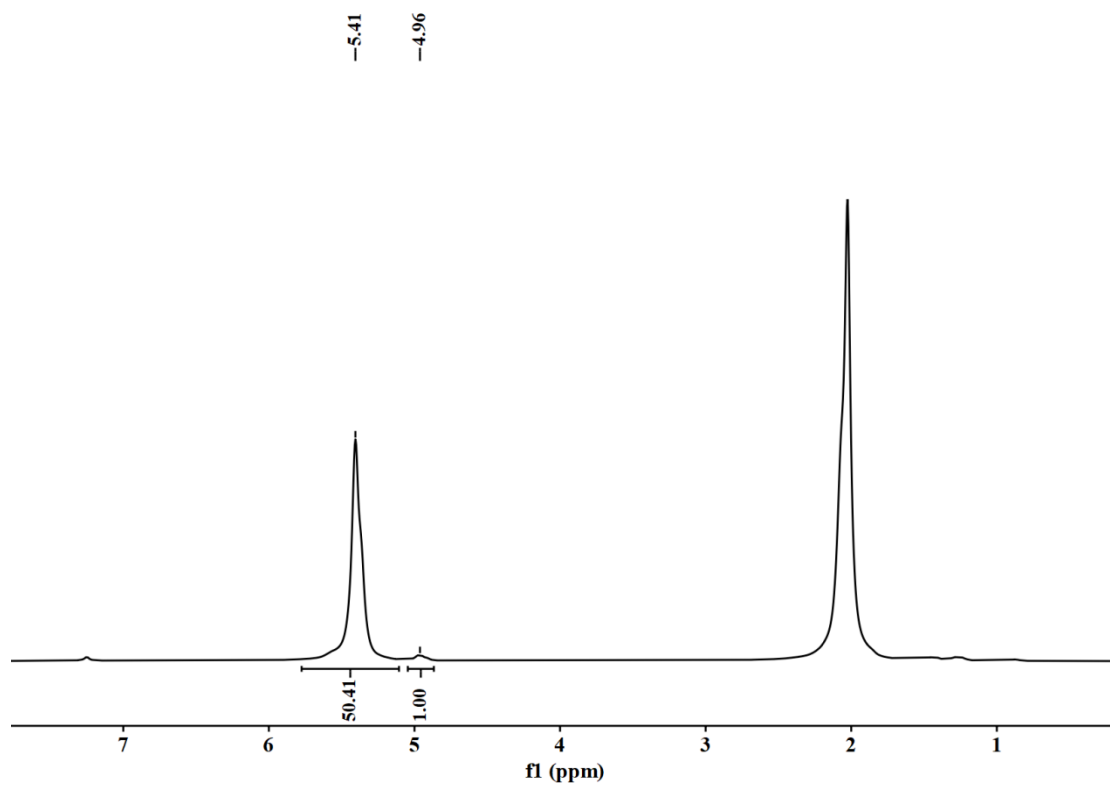

**Figure S34**  $^1\text{H}$  NMR (400 MHz,  $\text{CDCl}_3$ , 25  $^\circ\text{C}$ ) spectrum of polybutadiene catalyzed by **1-Ho** (Entry 31 in Table 1)

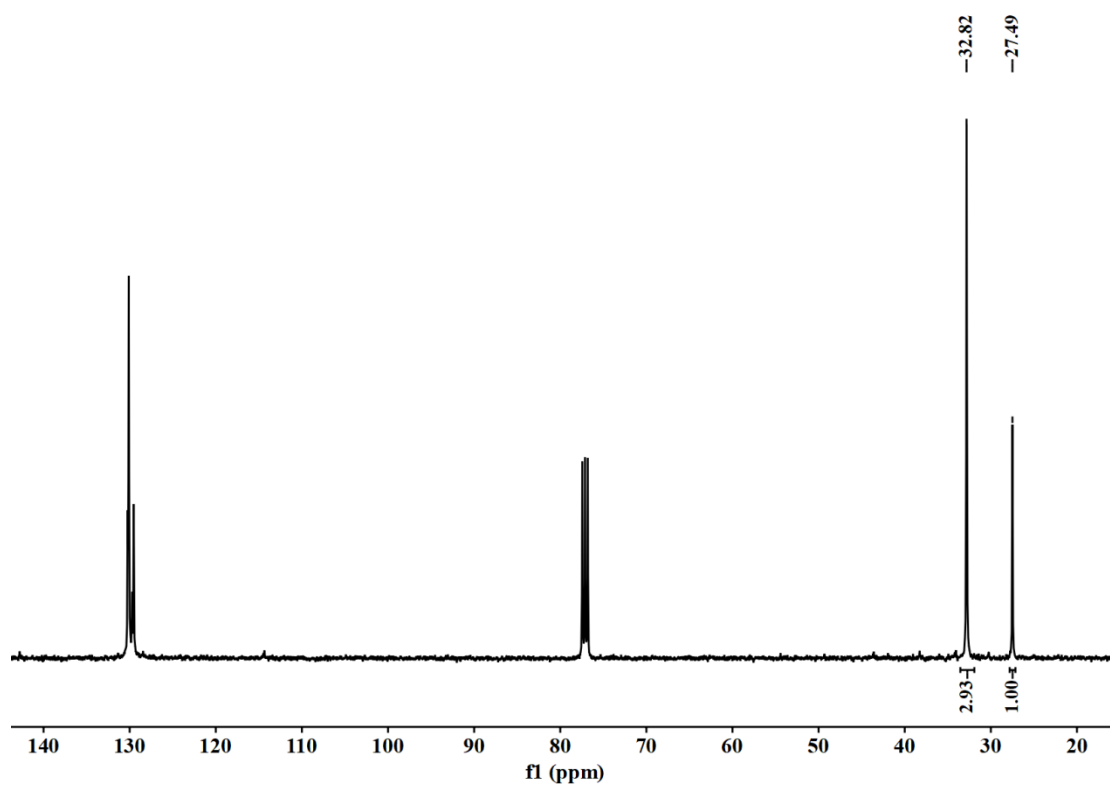

**Figure S35**  $^{13}\text{C}$  NMR (400 MHz,  $\text{CDCl}_3$ , 25  $^\circ\text{C}$ ) spectrum of polybutadiene catalyzed by **1-Ho** (Entry 31 in Table 1)

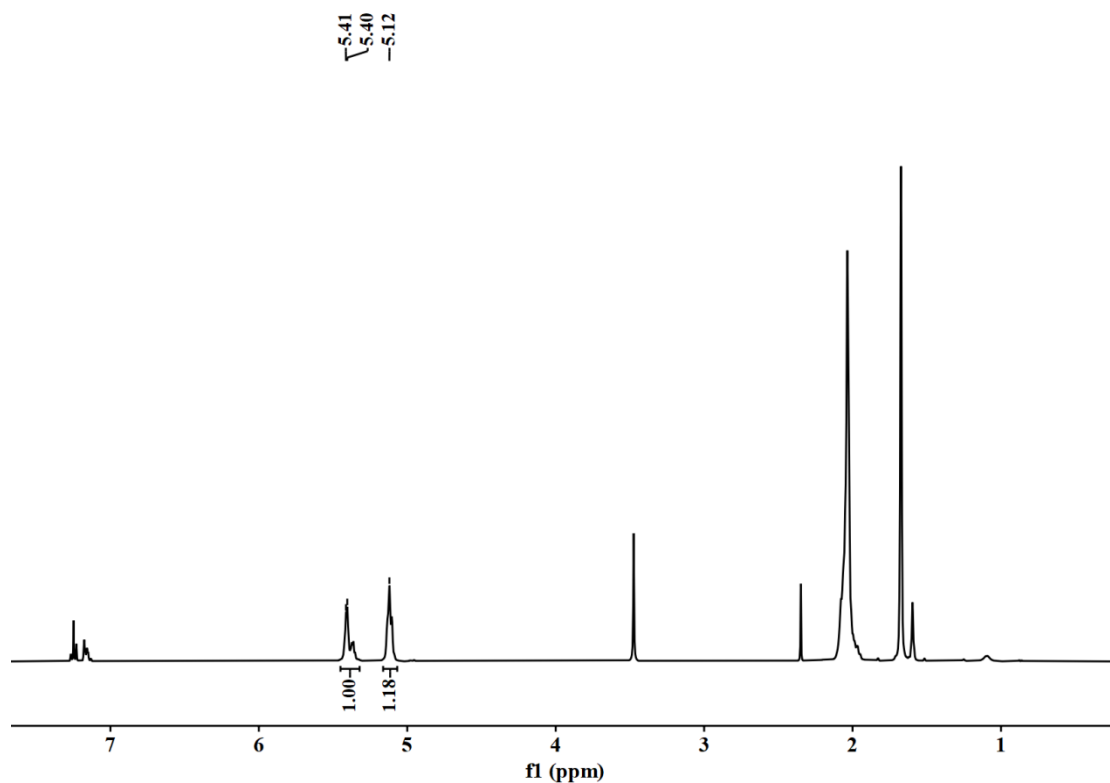

**Figure S36**  $^1\text{H}$  NMR (400 MHz,  $\text{CDCl}_3$ , 25  $^\circ\text{C}$ ) spectrum of copolymer **P-1** catalyzed by **1-Y** (Entry 1 in Table 2)

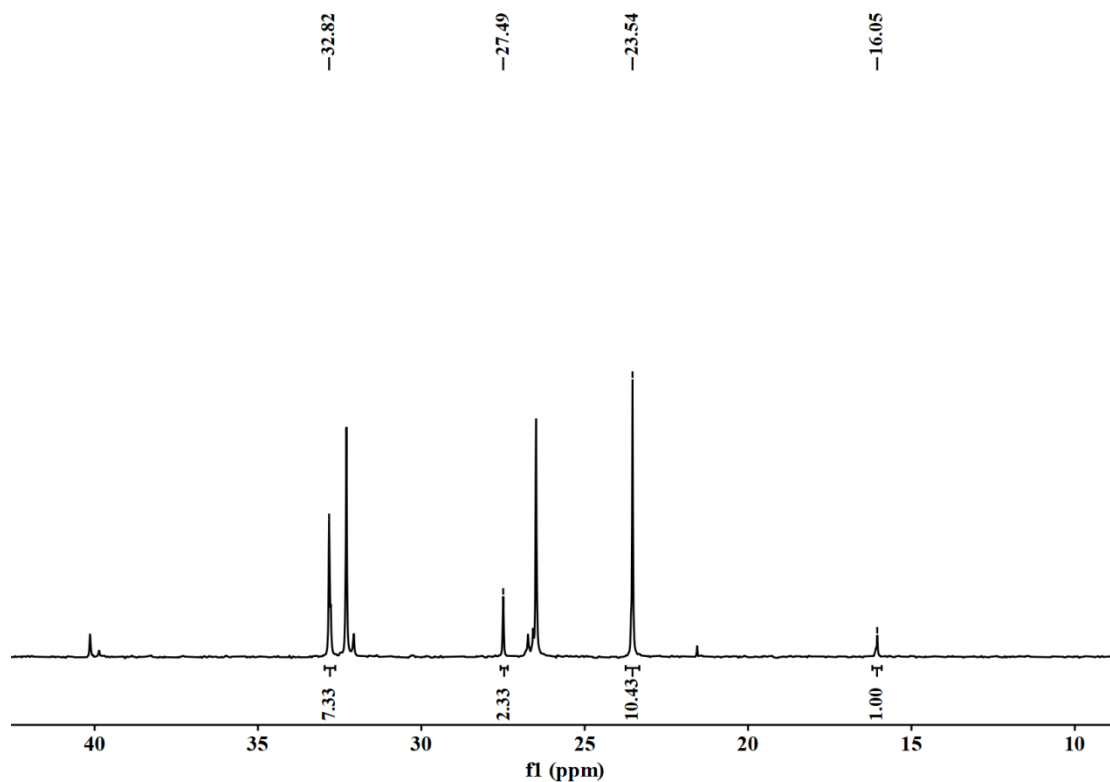

**Figure S37**  $^{13}\text{C}$  NMR (400 MHz,  $\text{CDCl}_3$ , 25  $^\circ\text{C}$ ) spectrum of copolymer **P-1** catalyzed by **1-Y** (Entry 1 in Table 2)

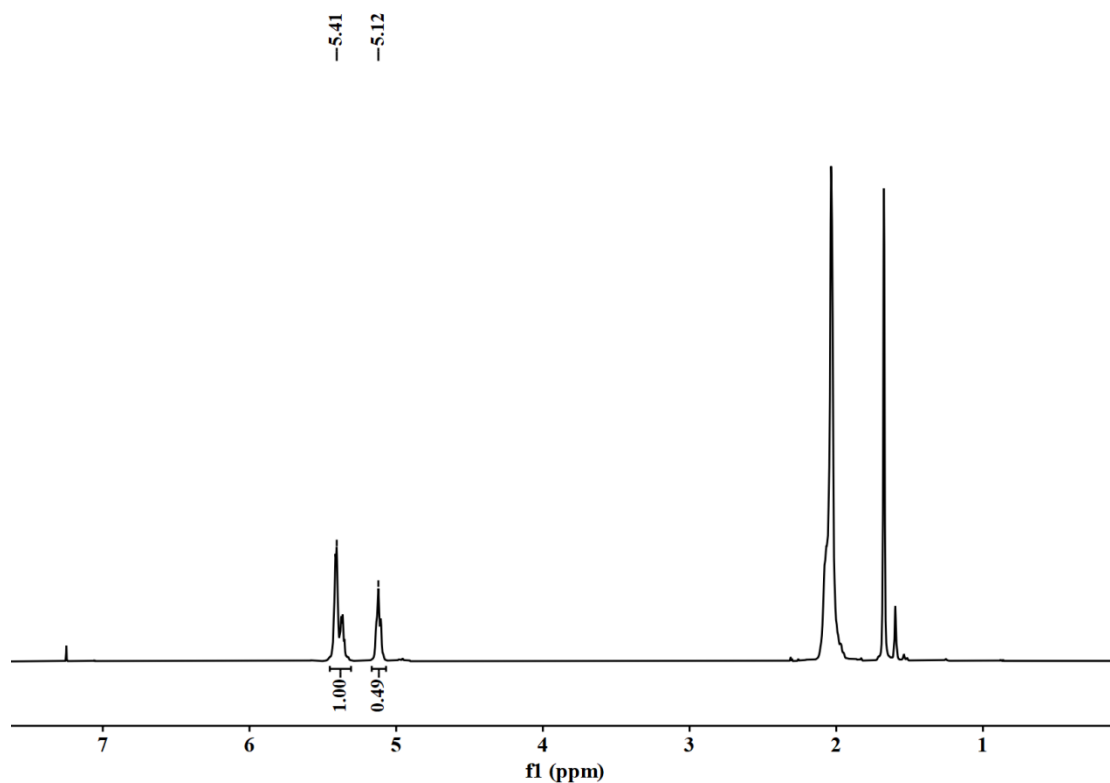

**Figure S38**  $^1\text{H}$  NMR (400 MHz,  $\text{CDCl}_3$ , 25  $^\circ\text{C}$ ) spectrum of copolymer **P-2** catalyzed by **1-Y** (Entry 2 in Table 2)

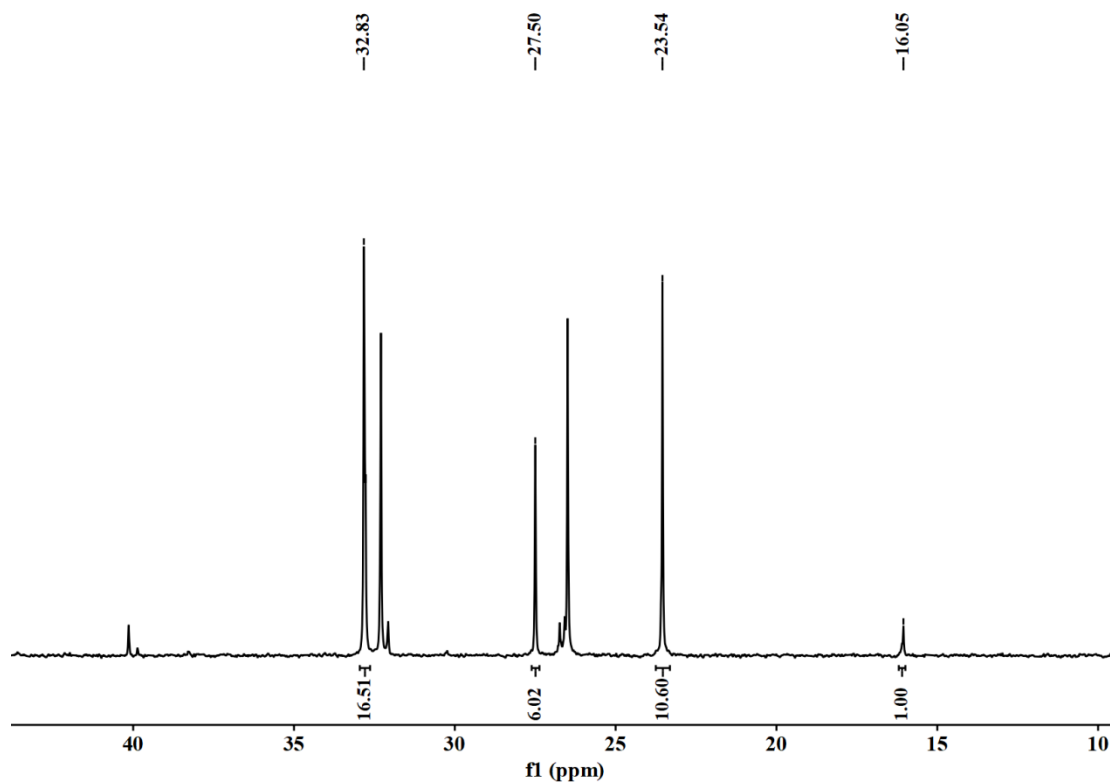

**Figure S39**  $^{13}\text{C}$  NMR (400 MHz,  $\text{CDCl}_3$ , 25  $^\circ\text{C}$ ) spectrum of copolymer **P-2** catalyzed by **1-Y** (Entry 2 in Table 2)



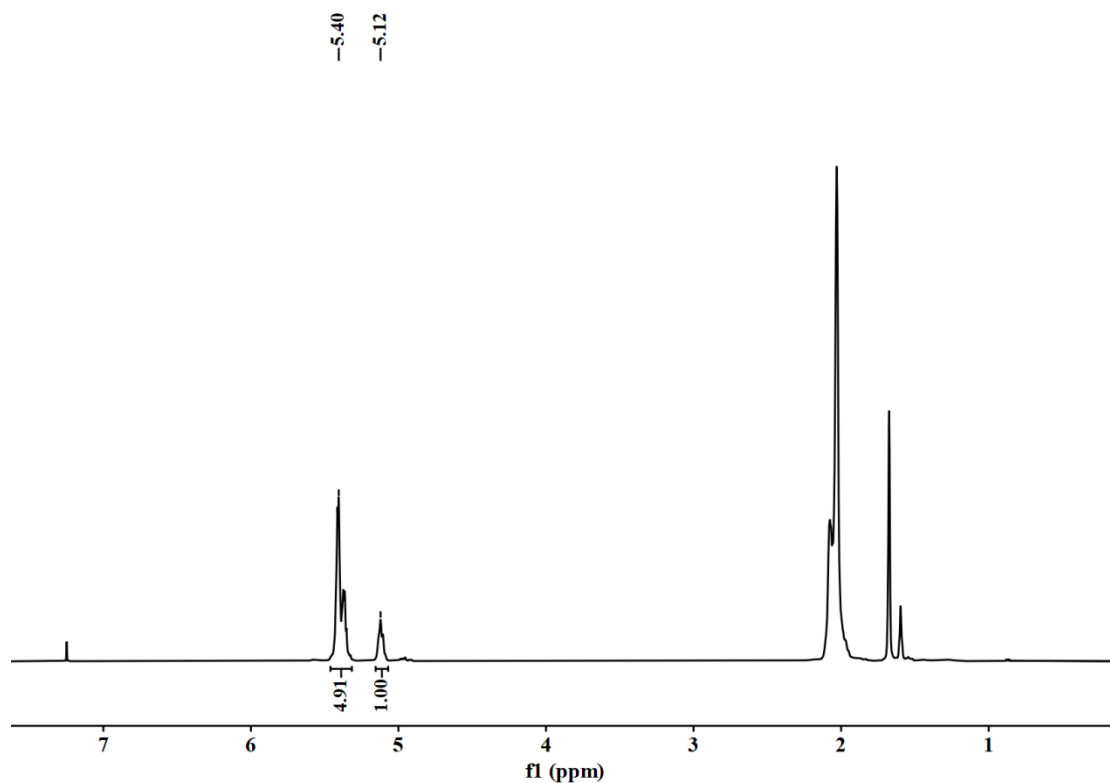

**Figure S40**  $^1\text{H}$  NMR (400 MHz,  $\text{CDCl}_3$ , 25  $^\circ\text{C}$ ) spectrum of copolymer **P-3** catalyzed by **1-Y** (Entry 3 in Table 2)

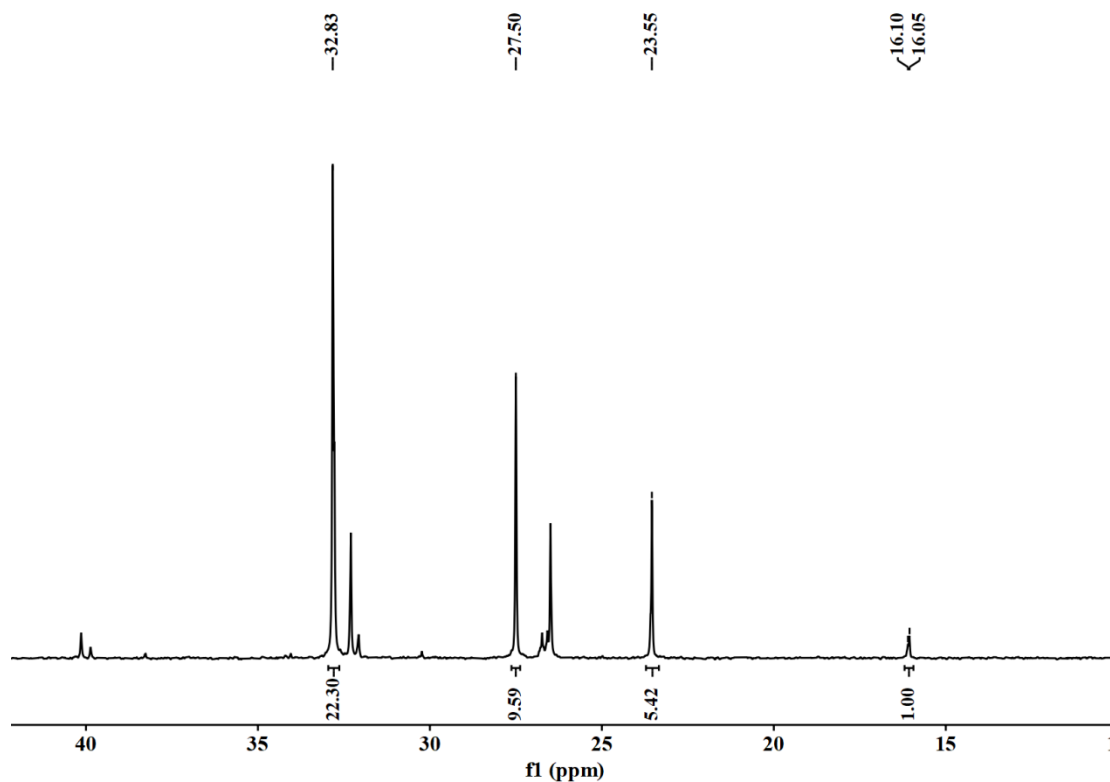

**Figure S41**  $^{13}\text{C}$  NMR (400 MHz,  $\text{CDCl}_3$ , 25  $^\circ\text{C}$ ) spectrum of copolymer **P-3** catalyzed by **1-Y** (Entry 3 in Table 2)

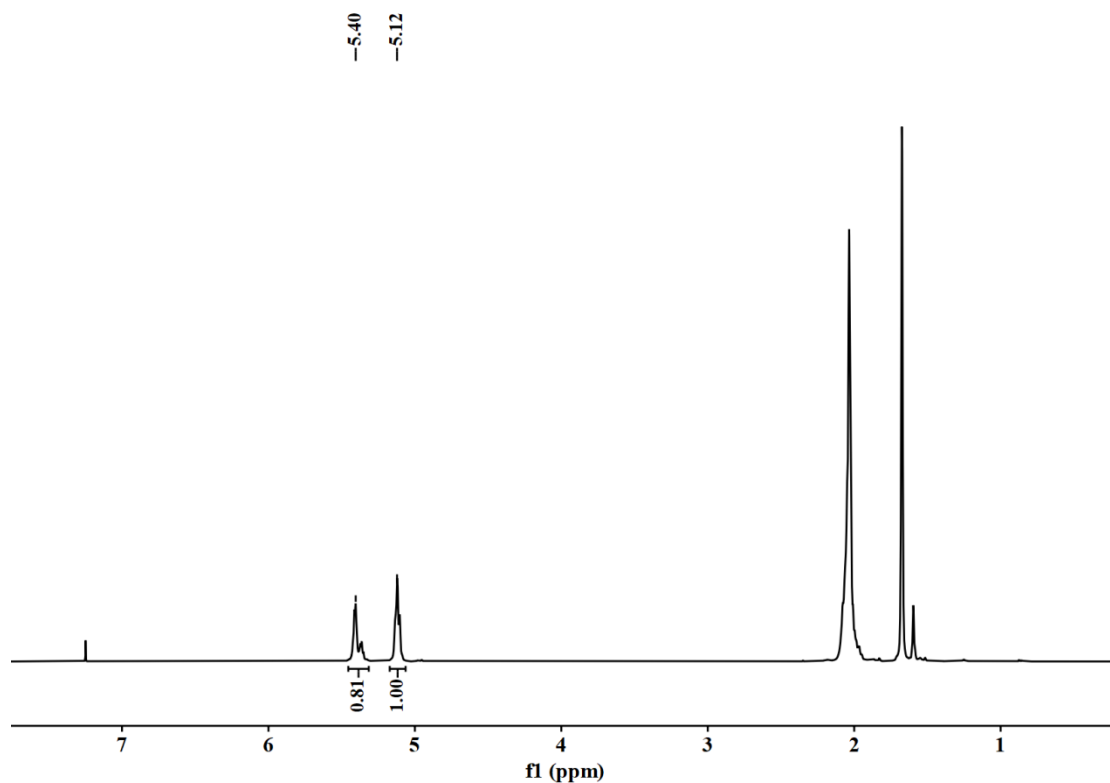

**Figure S42**  $^1\text{H}$  NMR (400 MHz,  $\text{CDCl}_3$ , 25 °C) spectrum of copolymer **P-4** catalyzed by **1-Y** (Entry 4 in Table 2)

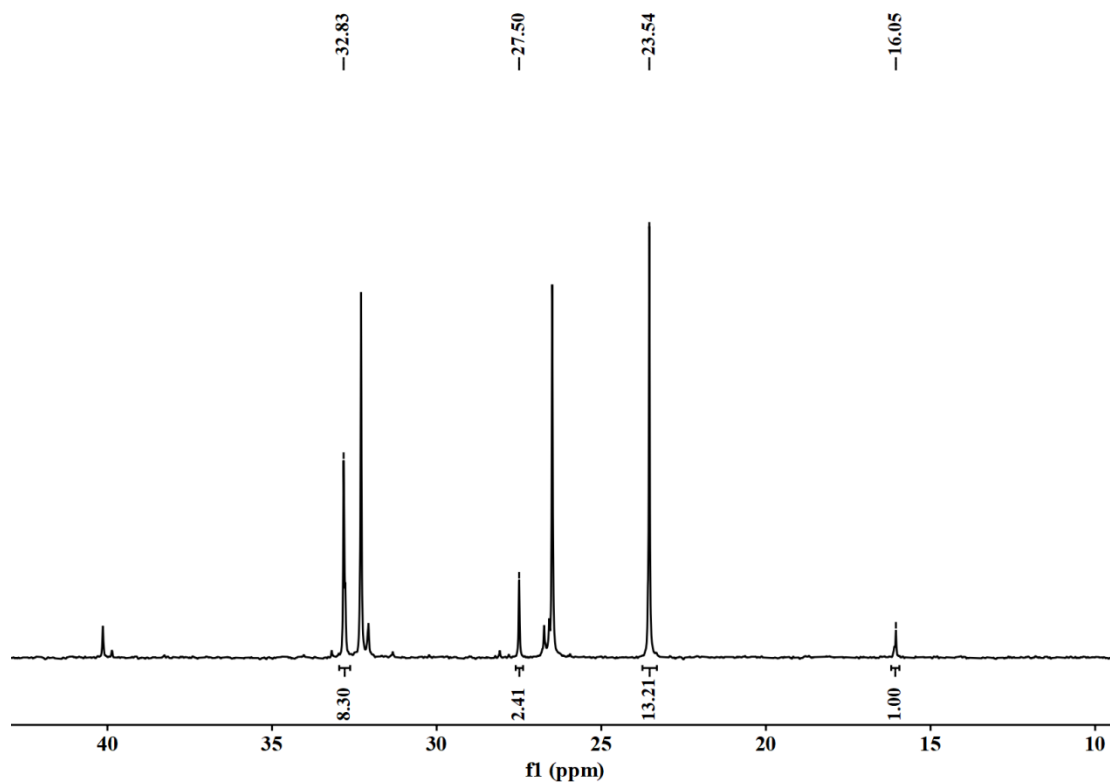

**Figure S43**  $^{13}\text{C}$  NMR (400 MHz,  $\text{CDCl}_3$ , 25 °C) spectrum of copolymer **P-4** catalyzed by **1-Y** (Entry 4 in Table 2)

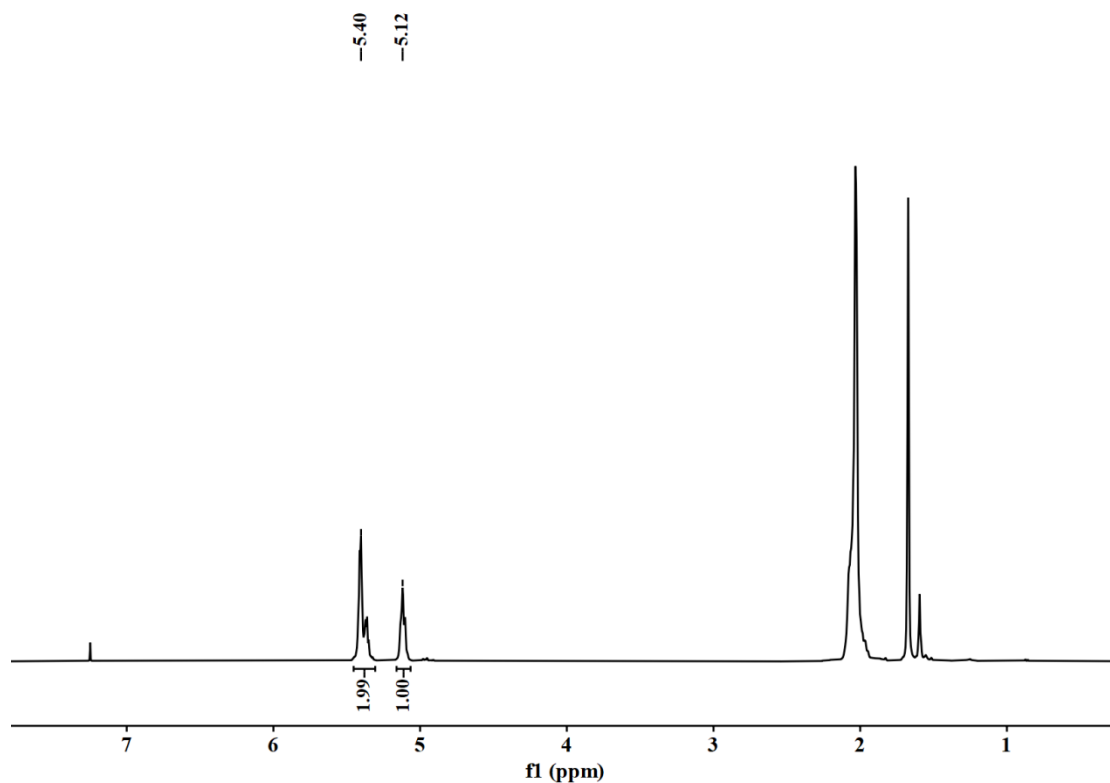

**Figure S44**  $^1\text{H}$  NMR (400 MHz,  $\text{CDCl}_3$ , 25  $^\circ\text{C}$ ) spectrum of copolymer **P-5** catalyzed by **1-Y** (Entry 5 in Table 2)

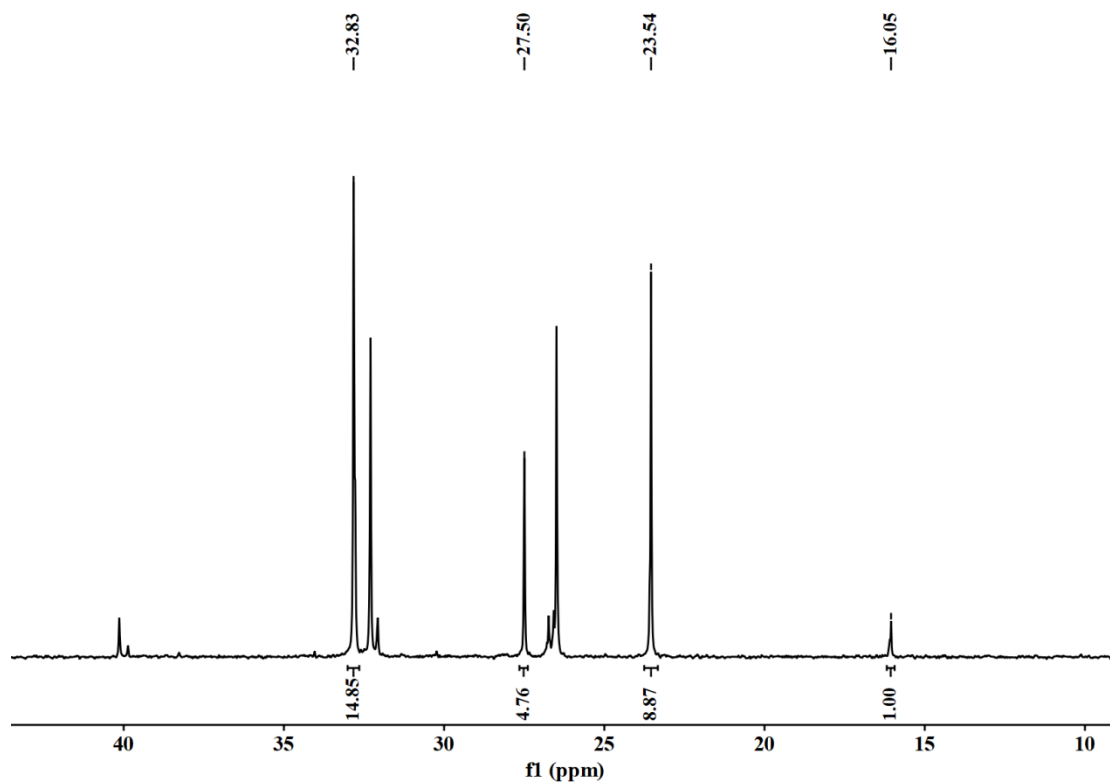

**Figure S45**  $^{13}\text{C}$  NMR (400 MHz,  $\text{CDCl}_3$ , 25  $^\circ\text{C}$ ) spectrum of copolymer **P-5** catalyzed by **1-Y** (Entry 5 in Table 2)

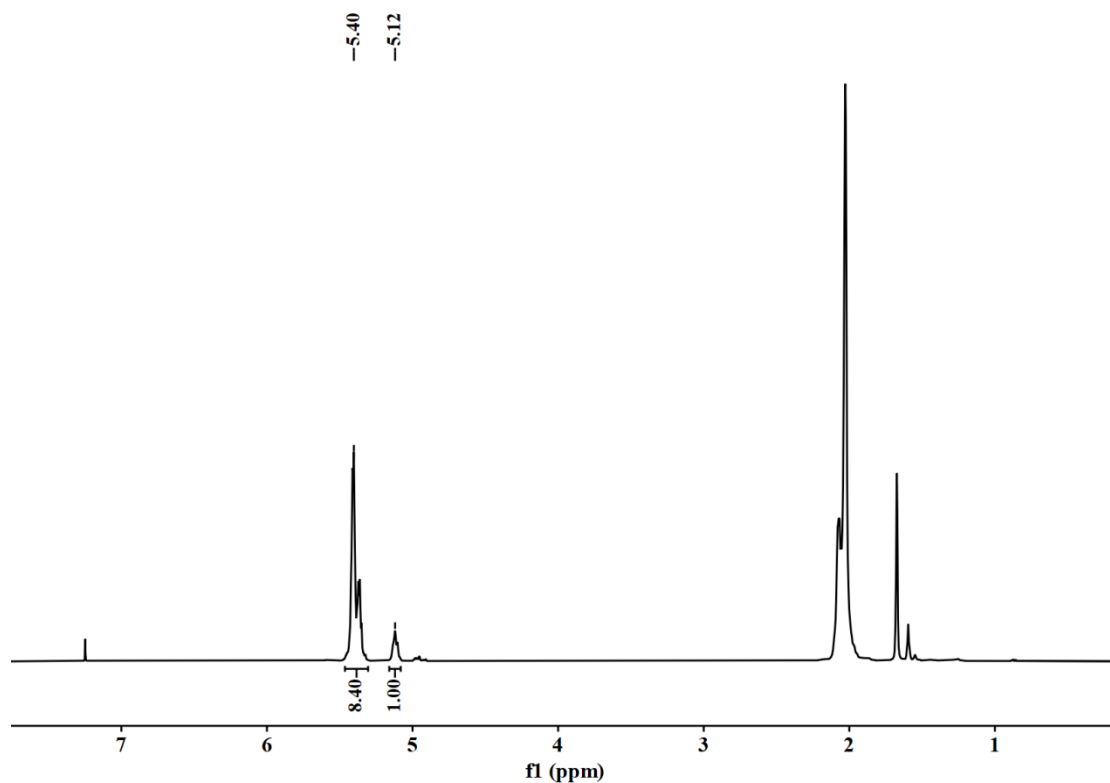

**Figure S46**  $^1\text{H}$  NMR (400 MHz,  $\text{CDCl}_3$ , 25  $^\circ\text{C}$ ) spectrum of copolymer **P-6** catalyzed by **1-Y** (Entry 6 in Table 2)

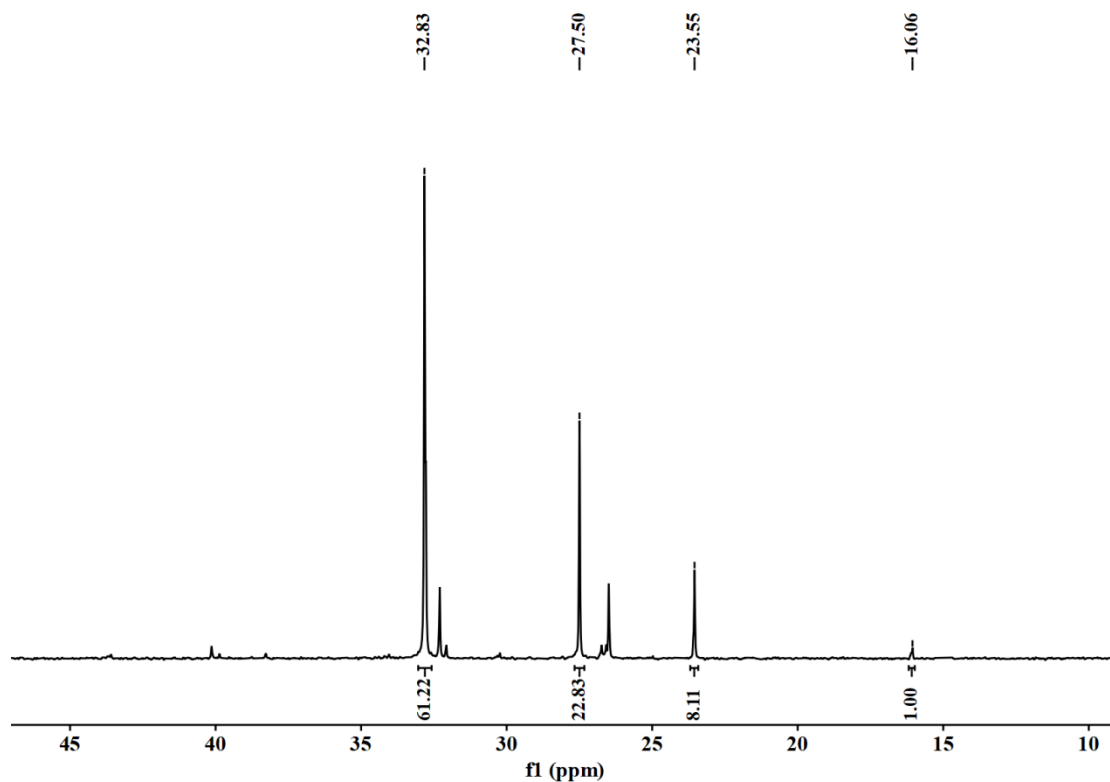

**Figure S47**  $^{13}\text{C}$  NMR (400 MHz,  $\text{CDCl}_3$ , 25  $^\circ\text{C}$ ) spectrum of copolymer **P-6** catalyzed by **1-Y** (Entry 6 in Table 2)

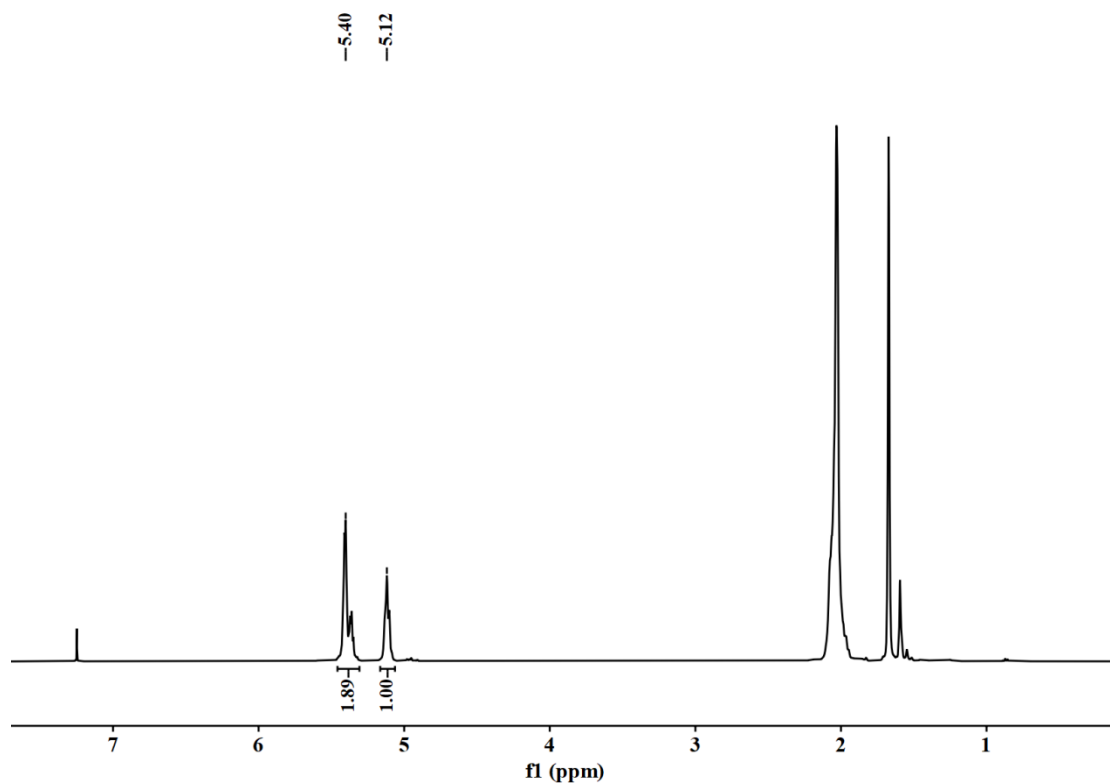

**Figure S48**  $^1\text{H}$  NMR (400 MHz,  $\text{CDCl}_3$ , 25  $^\circ\text{C}$ ) spectrum of copolymer **P-7** catalyzed by **1-Y** (Entry 7 in Table 2)

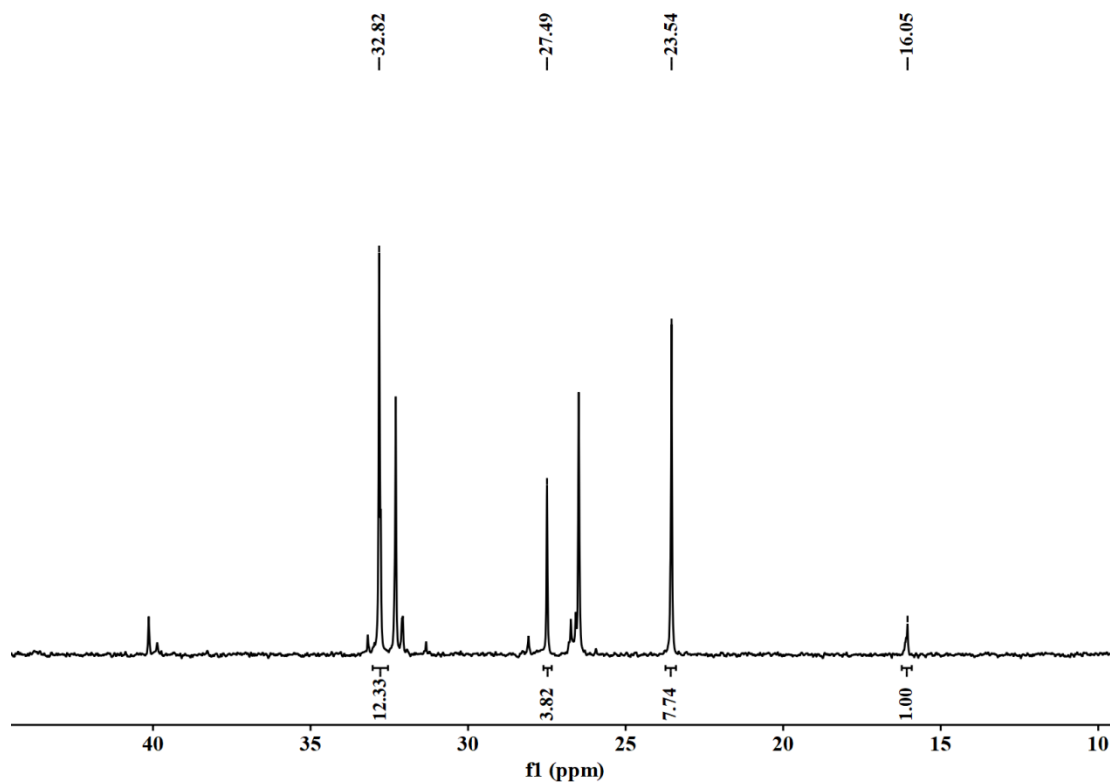

**Figure S49**  $^{13}\text{C}$  NMR (400 MHz,  $\text{CDCl}_3$ , 25  $^\circ\text{C}$ ) spectrum of copolymer **P-7** catalyzed by **1-Y** (Entry 7 in Table 2)

**Table S1** The data for Fineman-Ross diagram

| $F=(M_1/M_2)$ | $F=(m_1/m_2)$ | $F^2/f$ | $F(f-1)/f$ |
|---------------|---------------|---------|------------|
| 0.25          | 0.55          | 0.11    | -0.20      |
| 0.67          | 1.49          | 0.30    | 0.22       |
| 1.00          | 2.20          | 0.46    | 0.55       |
| 1.50          | 3.45          | 0.65    | 1.07       |
| 2.33          | 5.88          | 0.93    | 1.94       |

**Table S2** The data for content of isoprene and butadiene in the copolymers versus the conversions

| <b>Entry</b> | <b>Conversion (%)</b> | <b>Content of PIP sequence in the polymer</b> | <b>Content of PBD sequence in the polymer</b> |
|--------------|-----------------------|-----------------------------------------------|-----------------------------------------------|
| <b>1</b>     | 15.9                  | 66.7                                          | 33.3                                          |
| <b>2</b>     | 27.8                  | 66.4                                          | 33.6                                          |
| <b>3</b>     | 42.2                  | 64.4                                          | 35.6                                          |
| <b>4</b>     | 54.3                  | 63.1                                          | 36.9                                          |
| <b>5</b>     | 68.9                  | 61.3                                          | 38.7                                          |
| <b>6</b>     | 73.8                  | 59.7                                          | 40.3                                          |
| <b>7</b>     | 82.4                  | 57.5                                          | 42.5                                          |
| <b>8</b>     | 90.9                  | 54.3                                          | 45.7                                          |
| <b>9</b>     | 92.8                  | 53.5                                          | 46.5                                          |
| <b>10</b>    | 100.0                 | 50.7                                          | 49.3                                          |

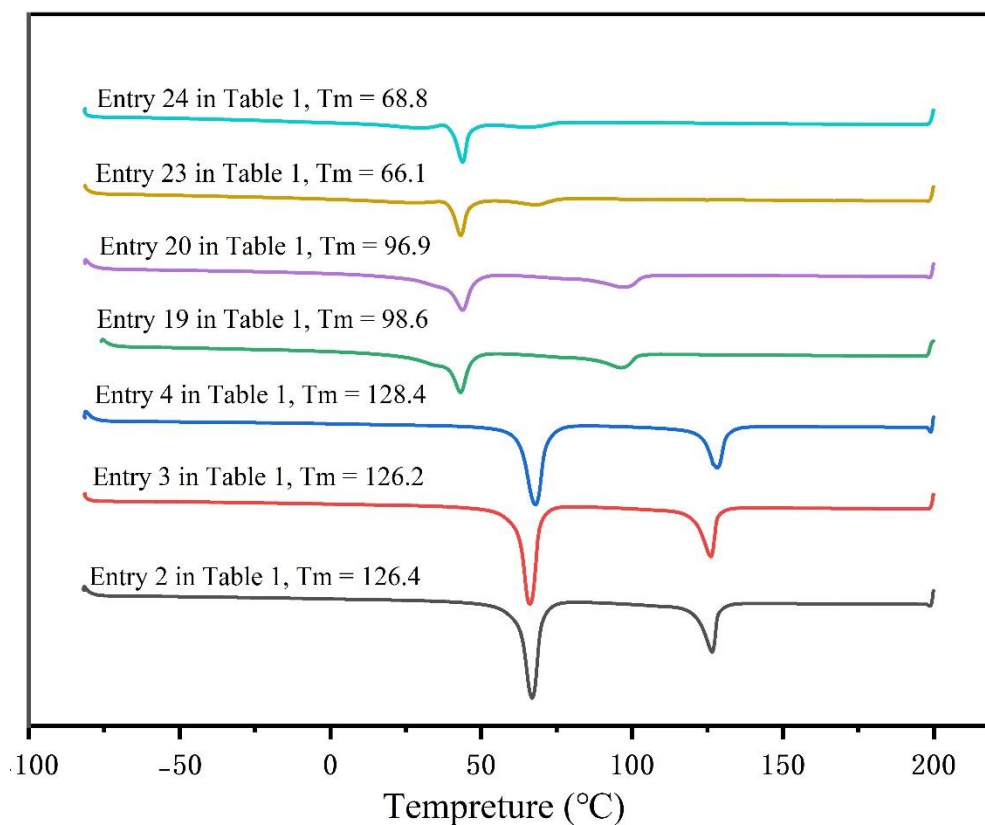

Figure S50 DSC curves of highly *trans*-1,4-PBD

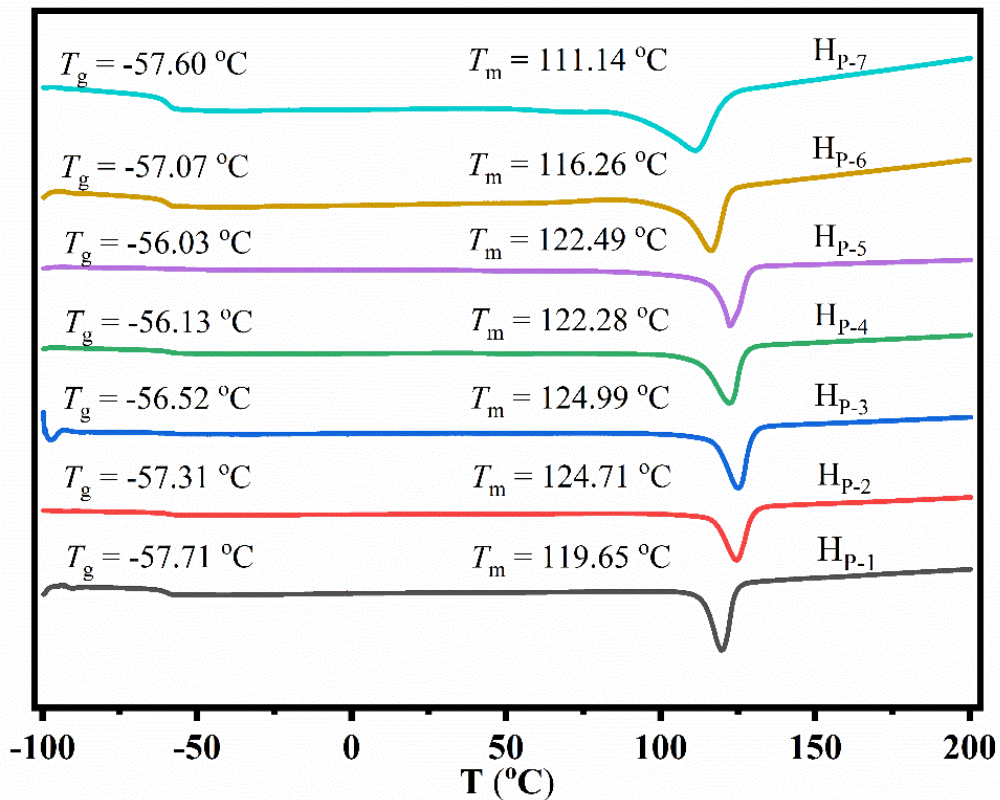

Figure S51 DSC curves of copolymers after hydrogenation
